# Supplementary material
Source: PubMed Central journal article supplement (PMC5570466)

## Supplementary Information

### **A pH-dependent fluorescent probe that can be tuned for cysteine or homocysteine**

Yongkang Yue,<sup>†,§</sup> Fangjun Huo,<sup>‡,§</sup> Xiaoqi Li,<sup>†</sup> Ying Wen,<sup>†</sup> Tao Yi,<sup>⊥,\*</sup> James Salamanca,<sup>¶</sup> Jorge O. Escobedo,<sup>¶</sup> Robert M. Strongin,<sup>¶,\*</sup> and Caixia Yin,<sup>†,\*</sup>

<sup>†</sup>Key Laboratory of Chemical Biology and Molecular Engineering of Ministry of Education, Institute of Molecular Science, Key Laboratory of Materials for Energy Conversion and Storage of Shanxi Province, Shanxi University, Taiyuan 030006, China.

<sup>‡</sup>Research Institute of Applied Chemistry, Shanxi University, Taiyuan, 030006, China.

<sup>⊥</sup>Department of Chemistry and Collaborative Innovation Center of Chemistry for Energy Materials, Fudan University, Shanghai 200433, China.

<sup>¶</sup>Department of Chemistry, Portland State University, Portland, Oregon 97201, United States.

## Experimental Section

**Experimental Details.** All chemicals were purchased from commercial suppliers and used without further purification. All solvents were purified prior to use. Distilled water was used after passing through a water ultra-purification system. TLC analysis was performed using precoated silica plates. Hitachi F-7000 fluorescence spectrophotometer was employed to measure fluorescence spectra. Shanghai Huamei Experiment Instrument Plants, China provided a PO-120 quartz cuvette (10 mm).  $^1\text{H}$  NMR and  $^{13}\text{C}$  NMR experiments were performed with a BRUKER AVANCE III HD 600 MHz and 151 MHz NMR spectrometer, respectively (Bruker, Billerica, MA). Coupling constants ( $J$  values) are reported in hertz. HR MS determinations were carried out on an AB SCIEX TripleTOF 5600 Instruments. ESI-MS was measured with an LTQ-MS (Thermo) Instrument. The cell imaging experiments were measured by a Leica DMi8 fluorescence inversion microscope system and an Olympus FV1000 confocal laser scanning microscope.

### Synthesis of probe 1.

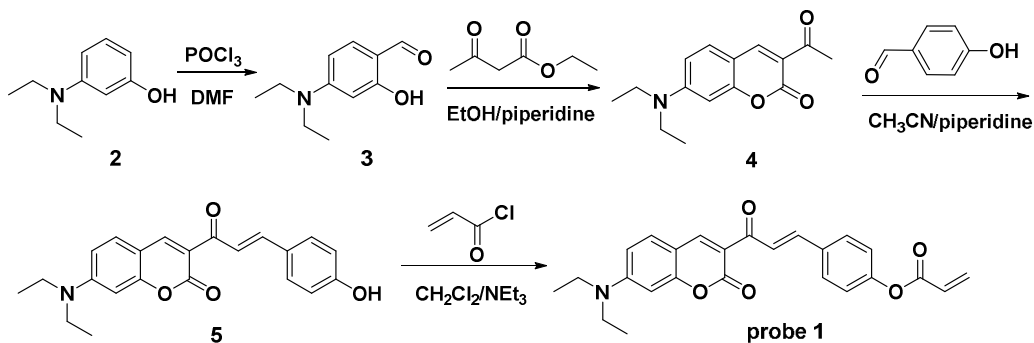

**Synthesis of compound 5.** Compound 4<sup>S1</sup> (6 mmol, 1.55 g) and *p*-hydroxy benzaldehyde (6 mmol, 0.732 g) was dissolved in 30 mL  $\text{CH}_3\text{CN}$ . 200  $\mu\text{L}$  piperidine was added and the mixture was refluxed for 11 hours. After cooling to room temperature, the mixture was filtrated, washed with 10 mL  $\text{CH}_3\text{CN}$ , and dried under reduce pressure to give 1.23 g (3.4 mmol) yellow powder.  $^1\text{H}$  NMR (600 MHz,  $\text{DMSO}-d_6$ ):  $\delta$  10.08 (s, 1H), 8.58 (s, 1H), 7.80 (d,  $J = 15.7$  Hz, 1H), 7.69 (d,  $J = 9.0$  Hz, 1H), 7.63 (d,  $J = 15.7$  Hz, 1H), 7.58 (d,  $J = 8.4$  Hz, 2H), 6.84 (d,  $J = 8.4$  Hz, 2H), 6.81 (d,  $J = 9.2$  Hz, 1H), 6.61 (s, 1H), 3.51 (dd,  $J = 13.5, 6.6$  Hz, 4H), 1.16 (t,  $J = 6.9$  Hz, 6H).  $^{13}\text{C}$  NMR (151 MHz,  $\text{DMSO}-d_6$ ):  $\delta$  185.8, 160.4, 160.4, 158.6, 153.3, 148.6, 143.1, 132.7, 130.9, 126.4, 122.0, 116.4, 116.3, 110.6, 108.4, 96.4, 44.9, 12.8. ESI-MS  $[\text{M}+\text{Na}]^+$ :  $m/z$  Calcd 386.14, Found 385.83.

**Synthesis of Probe 1.** To a solution of compound 5 (1 mmol, 0.36 g), triethylamine (3 equiv.) in  $\text{CH}_2\text{Cl}_2$  (15 mL) at 0  $^\circ\text{C}$ , acryloyl chloride (1.3 equiv.) was added gradually and the mixture was stirred for 20 h. After completion of the reaction, the solvent was separated under reduce pressure and the residue was purified by column chromatography using ethyl acetate/ petroleum ether (1:3) to give 0.108 g (0.26 mmol) probe 1 as a yellow solid.  $^1\text{H}$  NMR (600 MHz,  $\text{DMSO}-d_6$ ):  $\delta$  8.62 (s, 1H), 7.96 (d,  $J = 15.8$  Hz, 1H), 7.80 (d,  $J = 8.4$  Hz, 2H), 7.75 – 7.66 (m, 2H), 7.30 (d,  $J = 8.5$  Hz, 2H), 6.83 (d,  $J = 9.0$  Hz, 1H), 6.63 (s, 1H), 6.57 (d,  $J = 17.4$  Hz, 1H), 6.44 (dd,  $J = 17.3, 10.4$  Hz, 1H), 6.19 (d,  $J = 9.7$  Hz, 1H), 3.52 (dd,  $J = 13.2, 6.3$  Hz, 4H), 1.16 (t,  $J = 6.9$  Hz, 6H).  $^{13}\text{C}$  NMR (151 MHz,  $\text{DMSO}-d_6$ ):  $\delta$  186.0, 164.4, 160.4, 158.8, 153.5, 152.1, 149.0, 141.3, 134.4, 133.3, 132.9, 130.1, 128.0, 125.8, 122.9, 115.9, 110.8, 108.4, 96.4, 45.0, 12.9. HR MS  $[\text{M}+\text{H}]^+$ :  $m/z$  Calcd 418.1649, Found 418.1653.

**Preparation of Solutions of Probe 1 and Analytes.** Stock solution of probe 1 (2 mM) was prepared in DMSO. Stock solutions of Cys (20 mM), Hcy (20 mM), GSH (20 mM) and other amino acids (20 mM) were

prepared by direct dissolution in deionized water. All chemicals used were of analytical grade.

**General fluorescence spectra measurements.** All the detection experiments were measured in Hepes buffer–DMSO (1:1, v/v). The procedure was as follows: into a Hepes buffer–DMSO (1:1, v/v) solution, containing 30  $\mu\text{M}$  probe **1**, an analyte sample was added. The process was monitored by fluorescence spectrometer ( $\lambda_{\text{ex}} = 447 \text{ nm}$ , slit: 5 nm/5 nm).

#### **Cell Culture and Imaging.**

The HepG2 cells were grown in Dulbecco's Modified Eagle's medium supplemented with 12% Fetal Bovine Serum and 1% antibiotics at 37 °C in humidified environment of 5% CO<sub>2</sub>. Cells were plated on 6-well plate and allowed to adhere for 24 h. Before the experiments, cells were washed with PBS 3 times. For control, the HepG2 cells were pre-incubated with NEM (1 mM) for 30 min at 37 °C and then incubated with HBSS (Hanks' Balanced Salt Solution (with Ca<sup>2+</sup>, Mg<sup>2+</sup>)) of pH 7.8 in the presence of 10  $\mu\text{M}$  nigericin and 5  $\mu\text{M}$  probe **1** for 30 min. For Cys, the HepG2 cells were pre-incubated with NEM (1 mM) for 30 min at 37 °C, then incubated with HBSS (Hanks' Balanced Salt Solution (with Ca<sup>2+</sup>, Mg<sup>2+</sup>)) of pH 7.8 in the presence of 10  $\mu\text{M}$  nigericin and 5  $\mu\text{M}$  probe **1** for 30 min and further incubated with HBSS of pH 7.8 in the presence of 10  $\mu\text{M}$  nigericin and 100  $\mu\text{M}$  Cys for 60 min. For Hcy, the HepG2 cells were pre-incubated with NEM (1 mM) for 30 min at 37 °C, then incubated with HBSS (Hanks' Balanced Salt Solution (with Ca<sup>2+</sup>, Mg<sup>2+</sup>)) of pH 7.8 in the presence of 10  $\mu\text{M}$  nigericin and 5  $\mu\text{M}$  probe **1** for 30 min and further incubated with HBSS of pH 7.8 in the presence of 10  $\mu\text{M}$  nigericin and 100  $\mu\text{M}$  Hcy for 60 min. Cell imaging was then carried out after washing cells with HBBS buffer.

**Cell Viability.** Cytotoxicity was assessed by performing MTT assay with the HepG2 cells. Cells were seeded into a 96-well plate at  $2 \times 10^3$ /well and were cultured at 37 °C and 5% CO<sub>2</sub> for 24 h. Different concentrations of probe **1** (0, 2.5, 5, 10, 25, and 50  $\mu\text{M}$ ) were then added to the wells. After incubation for 6 or 12 h, MTT (0.5 mg/mL) was added to each well, and the plate was incubated for another 4 h. The optical densities at 490 nm were measured.

#### **REFERENCES**

- (S1) Li, X.; Zhao, Y. X.; Wang, T.; Shi, M. Q.; Wu, F. P. *Dyes Pigments*, **2007**, *74*, 108.

Characterization data for Synthesis:

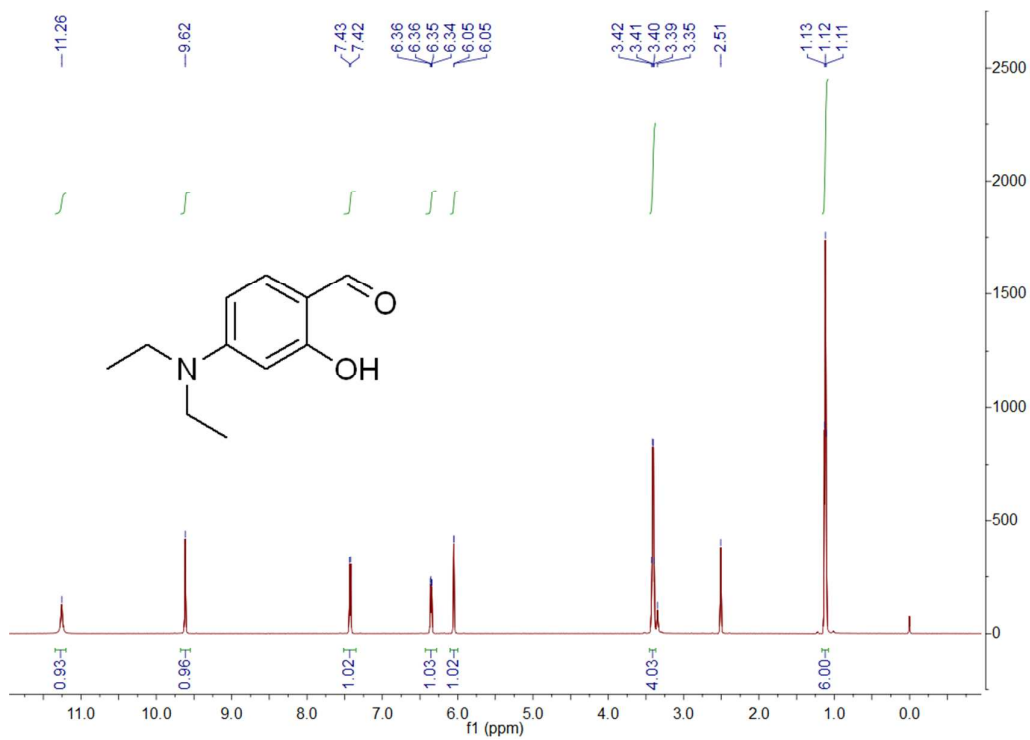

<sup>1</sup>H-NMR spectrum of compound **3** in DMSO-*d*<sub>6</sub>

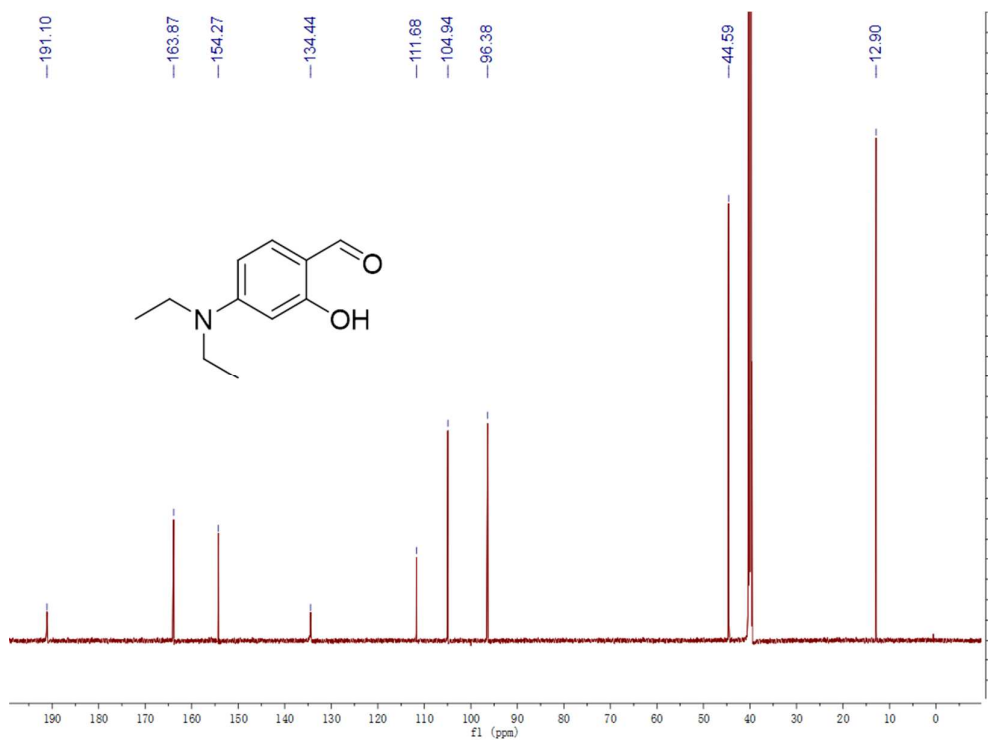

<sup>13</sup>C-NMR spectrum of compound **3** in DMSO-*d*<sub>6</sub>

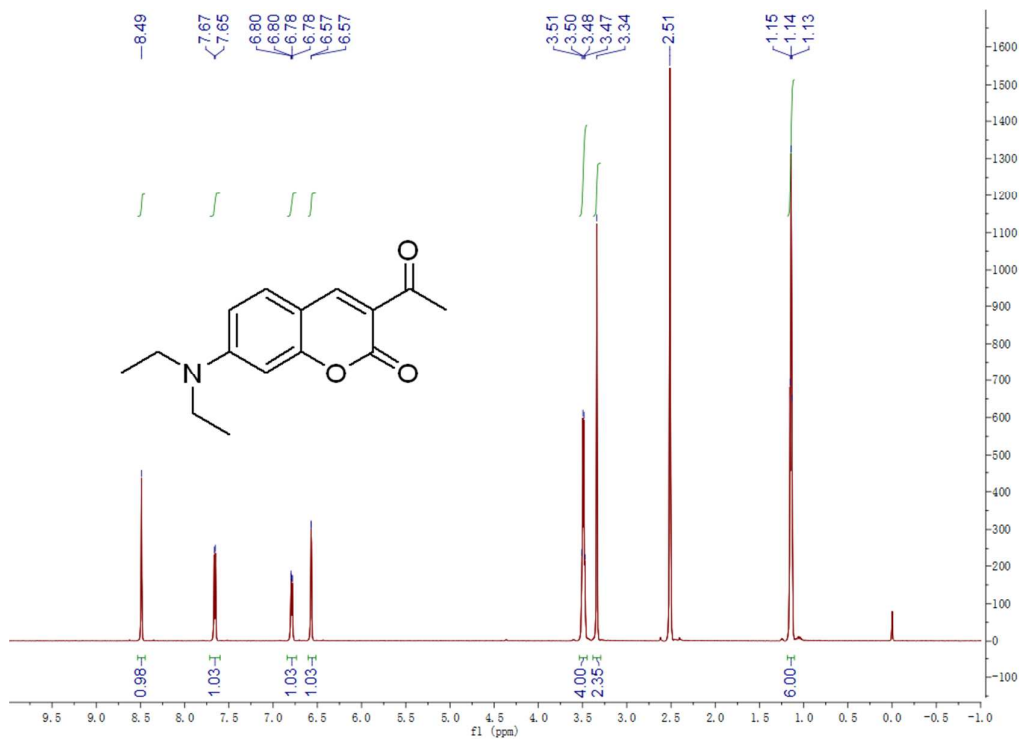

<sup>1</sup>H-NMR spectrum of compound 4 in DMSO-*d*<sub>6</sub>

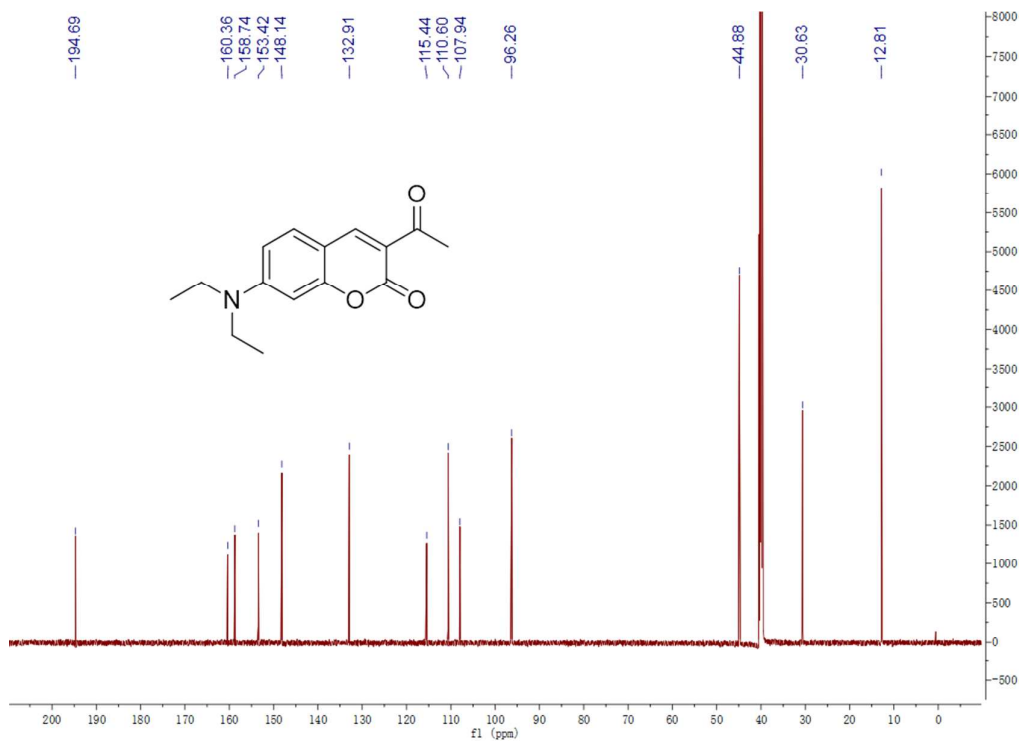

<sup>13</sup>C-NMR spectrum of compound 4 in DMSO-*d*<sub>6</sub>

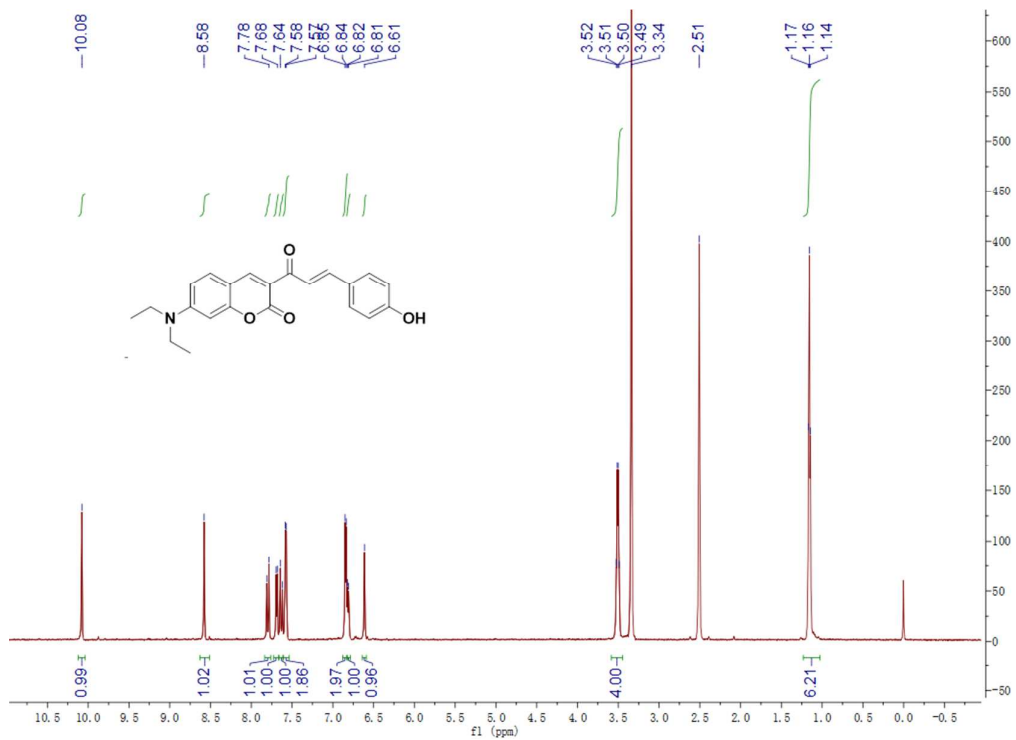

<sup>1</sup>H-NMR spectrum of compound 5 in DMSO-*d*<sub>6</sub>

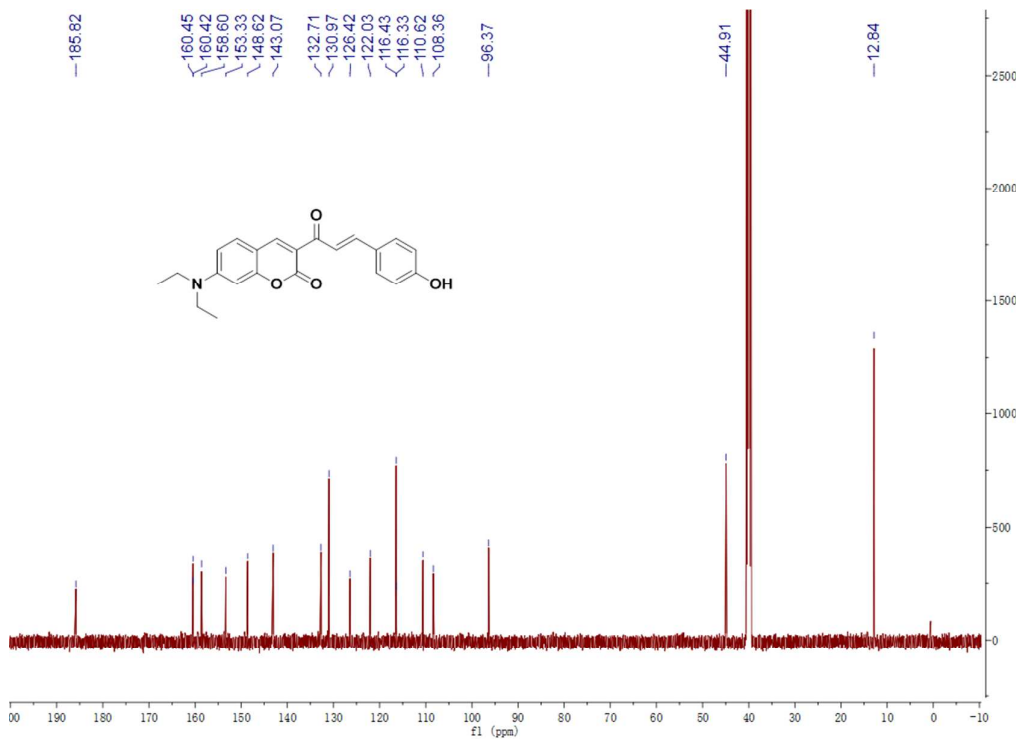

<sup>13</sup>C-NMR spectrum of compound 5 in DMSO-*d*<sub>6</sub>

24+ 151230173503 #43-53 RT: 0.19-0.24 AV: 11 NL: 1.75E6  
T: ITMS + p ESI Full ms [100.00-1000.00]

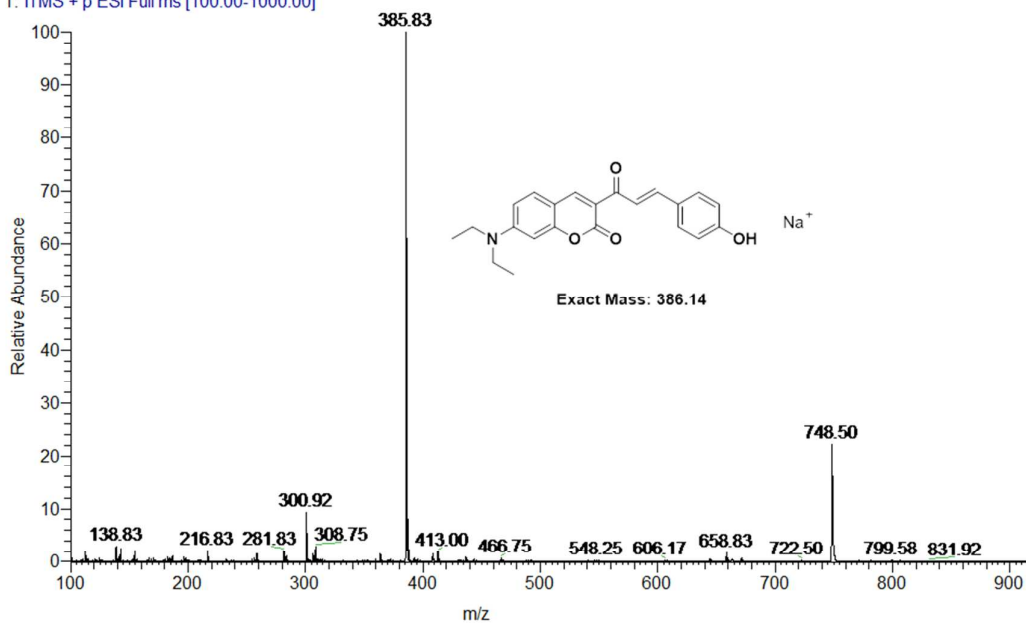

ESI-MS spectrum of compound 5 in MeOH

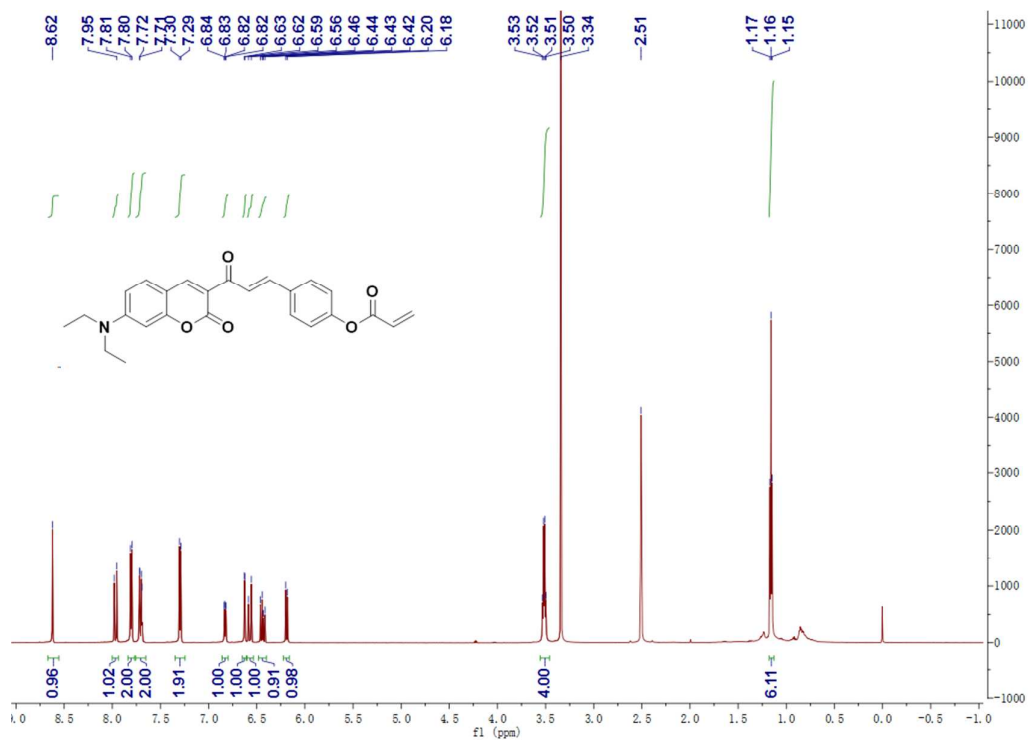

<sup>1</sup>H-NMR spectrum of probe 1 in DMSO-*d*<sub>6</sub>

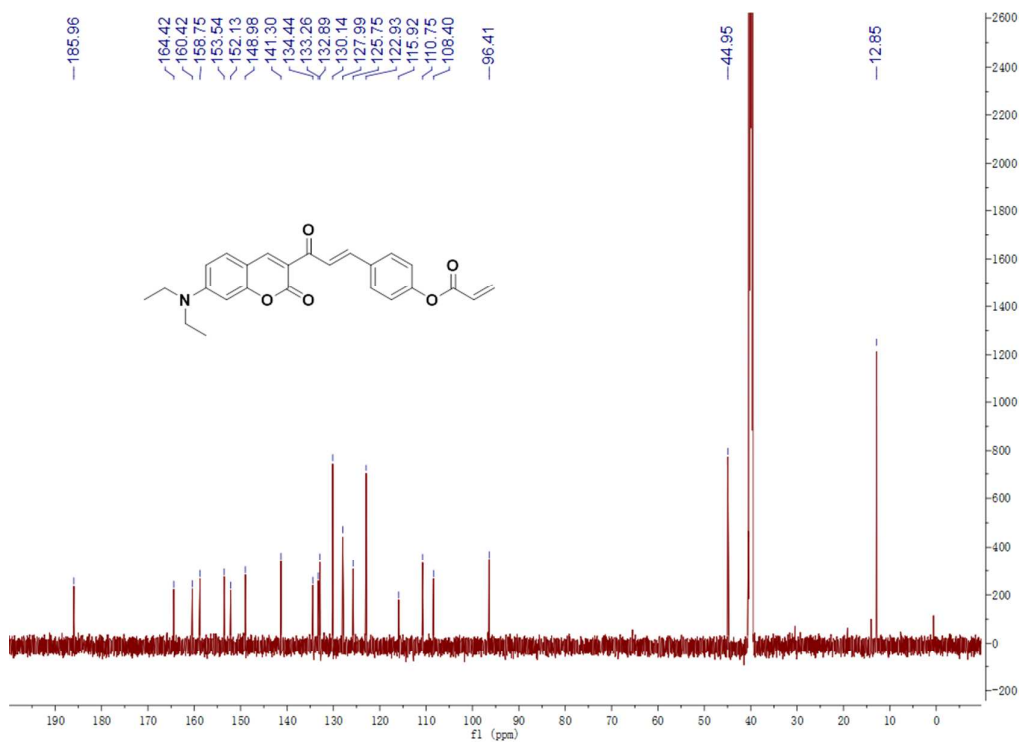

<sup>13</sup>C-NMR spectrum of probe 1 in DMSO-*d*<sub>6</sub>

Spectrum from 110-20.wiff (sample 1) - Sample020, Experiment 1, +TOF MS (100 - 2000) from 0.224 min

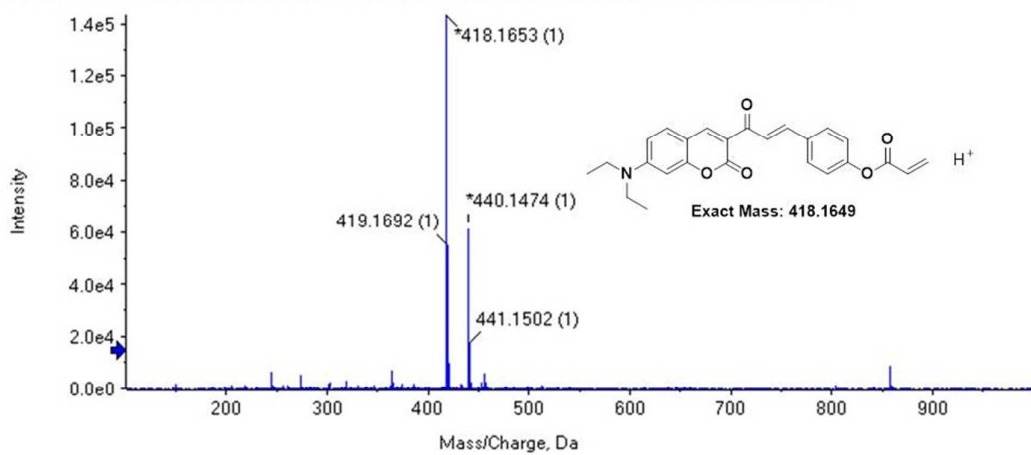

HR MS spectrum of probe 1



Figure S1 <sup>1</sup>H NMR affiliation of compound 4, 5, probe 1, probe 1-Cys and probe 1-Hcy.

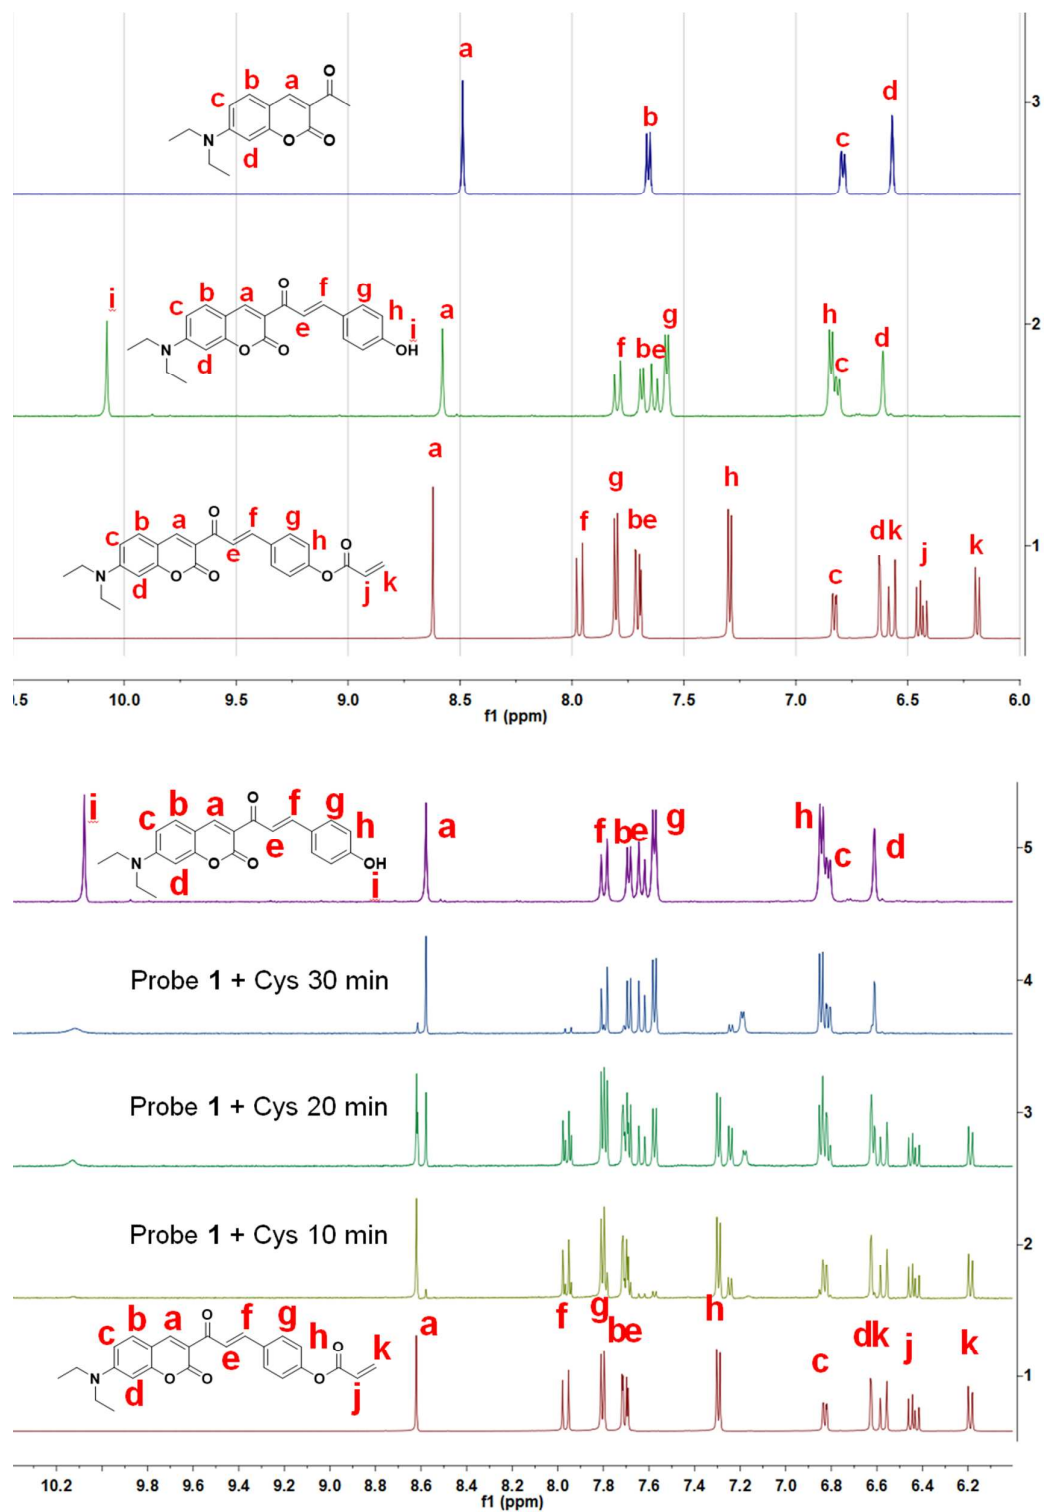

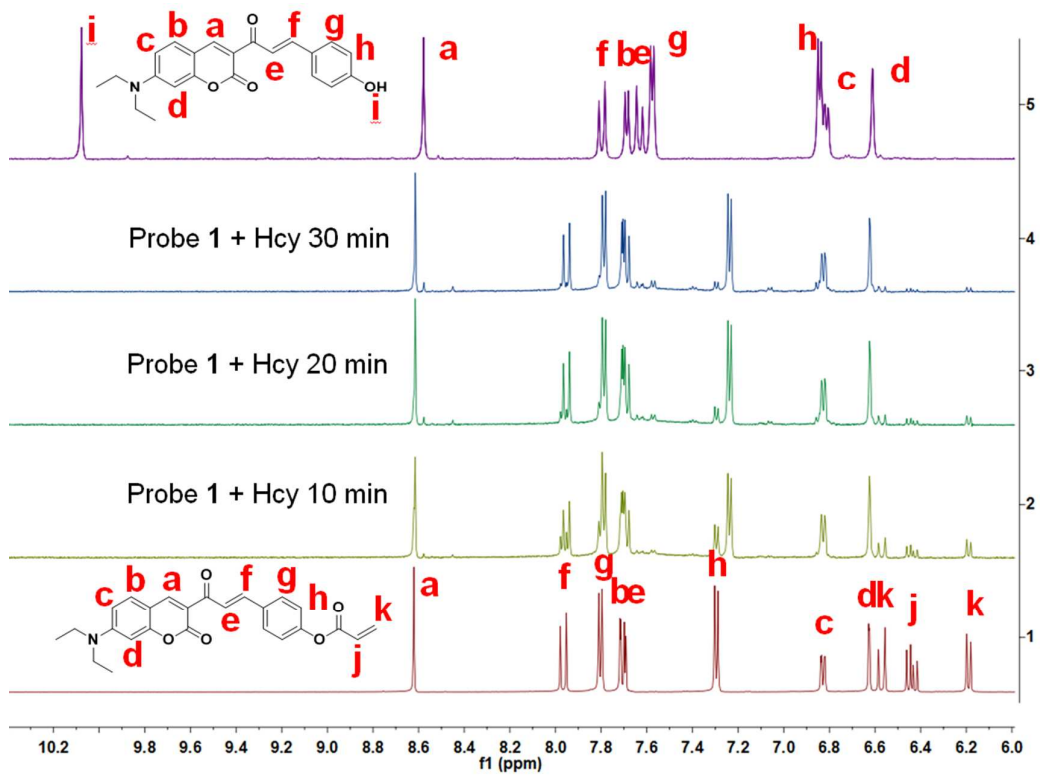

Figure S2 HR MS spectra of the probe 1-Cys system

Spectrum from 0112-21-NEG.wiff (sample 1) - Sample002, Experiment 1, -TOF MS (100 - 2000) from 0.258 min

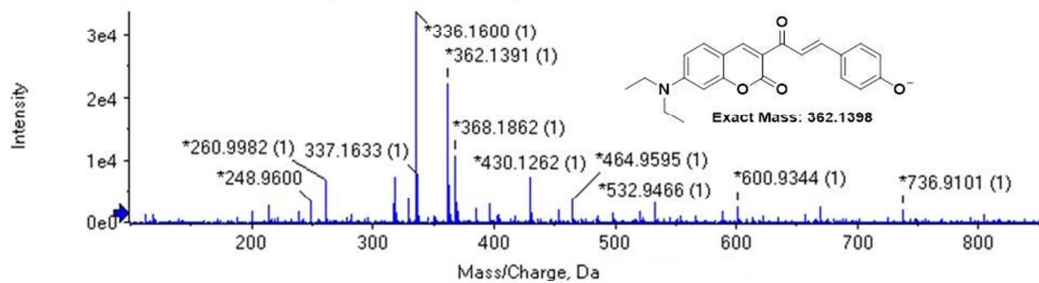

Spectrum from 110-21.wiff (sample 1) - Sample021, Experiment 1, +TOF MS (100 - 2000) from 0.255 min

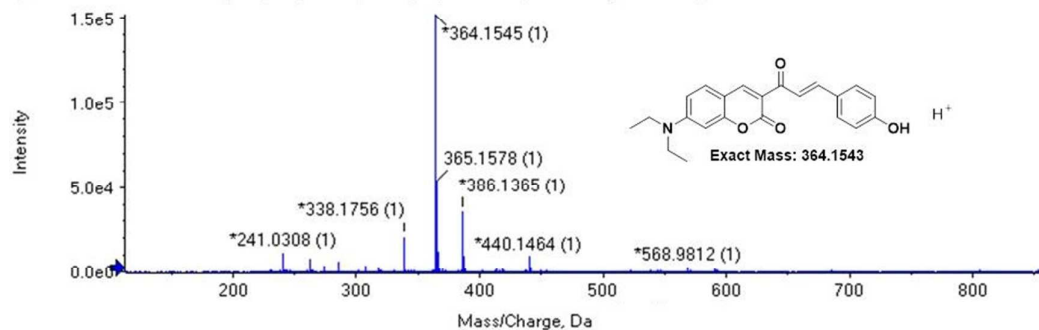

Figure S3 HR MS spectra of the probe 1-Hcy system

28+ 151230183807 #45-72 RT: 0.19-0.30 AV: 28 NL: 5.88E6  
T: FTMS + p ESI Full ms [100.00-1000.00]

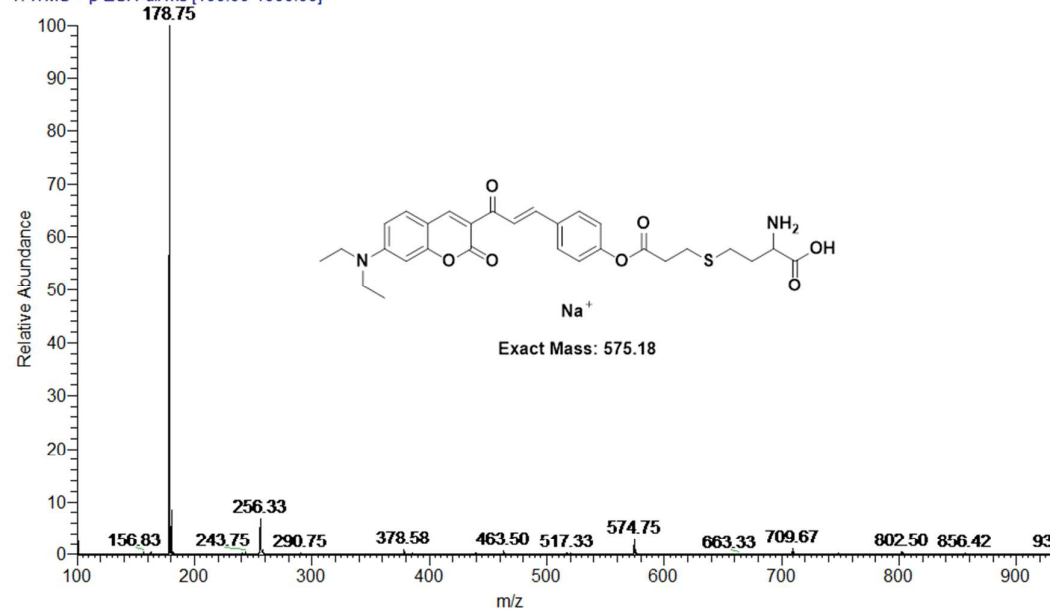

Figure S4 Fluorescent and UV-vis responses of probe 1 towards Hcy and GSH in Hepes buffer/DMSO (1:1, v/v, pH 7.4) solution at 25 °C

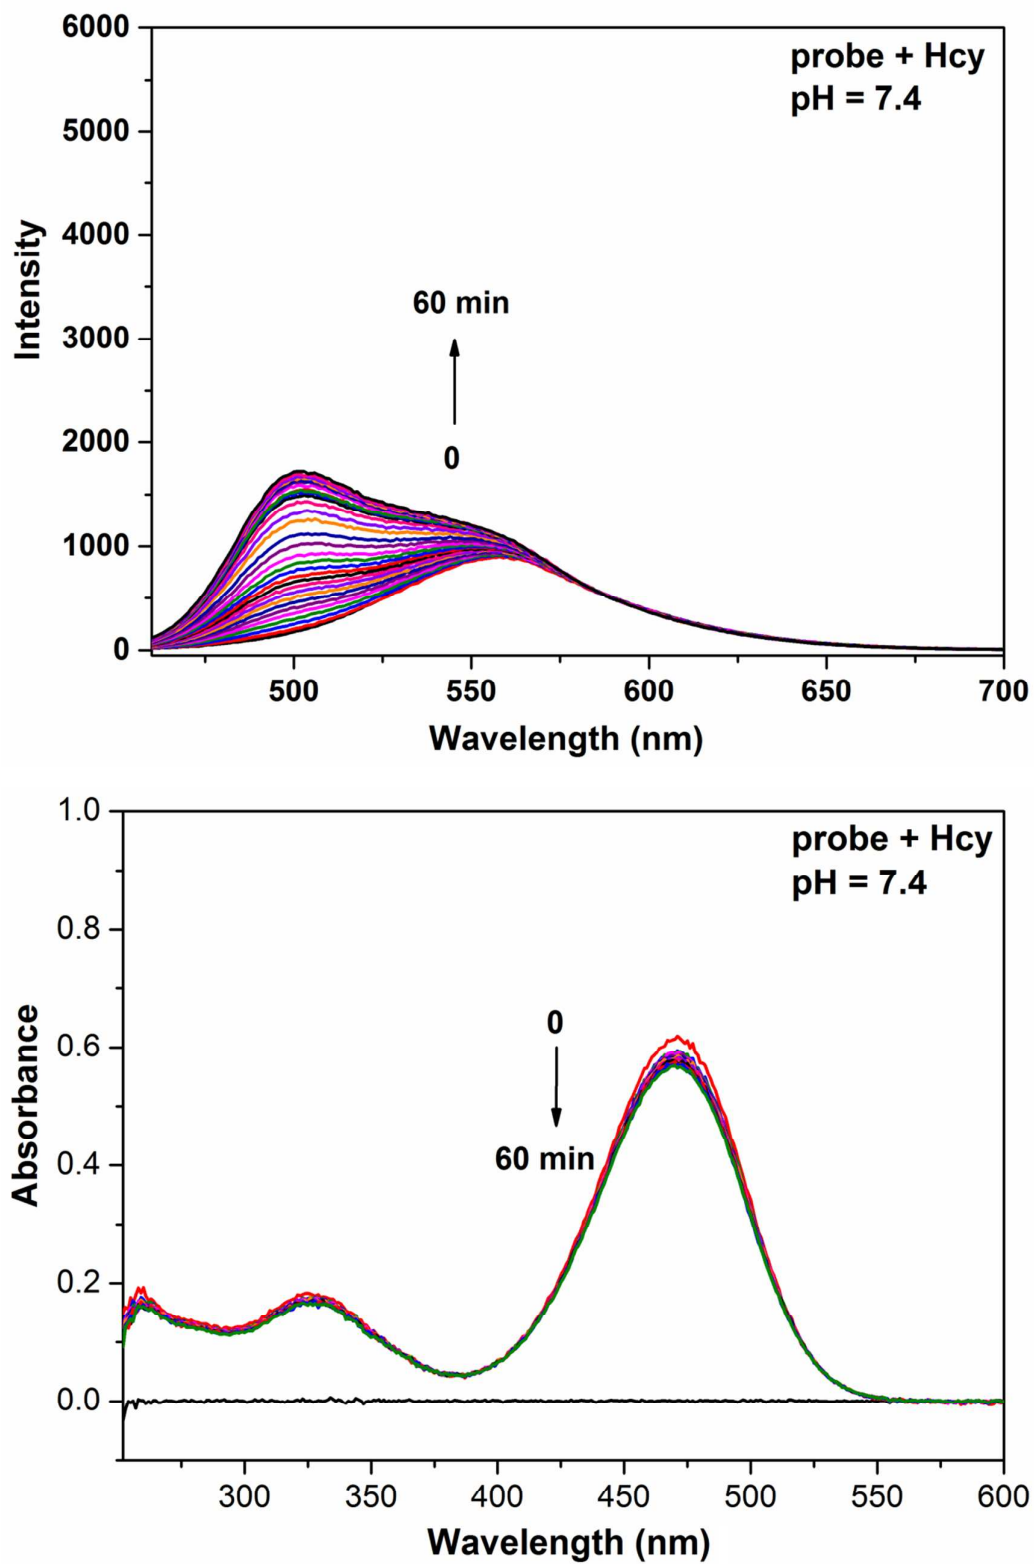

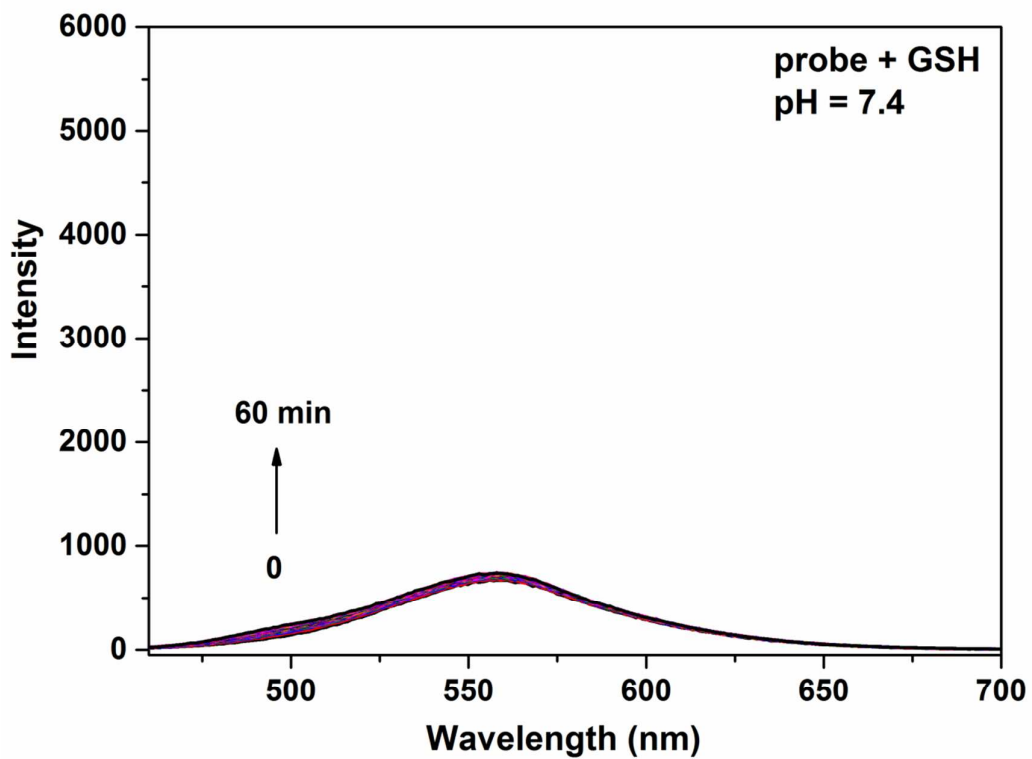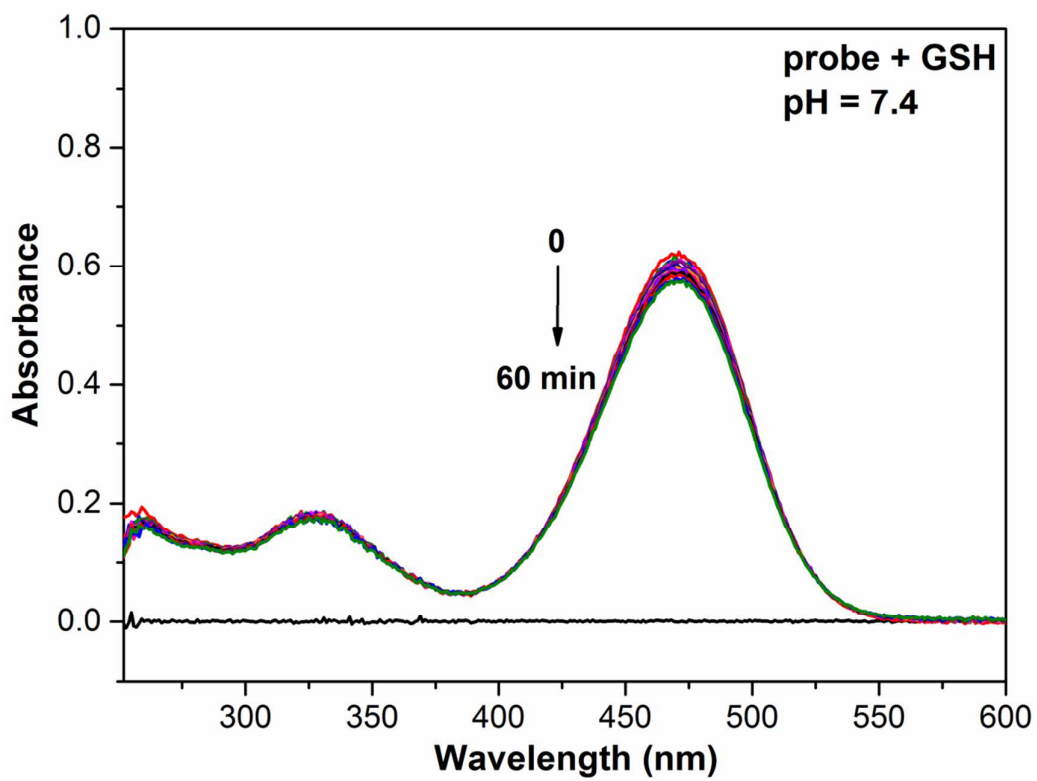

Figure S5 Fluorescent and UV-vis responses of probe 1 towards Cys, Hcy and GSH in Hepes buffer/DMSO (1:1, v/v, pH 7.6) solution at 25 °C

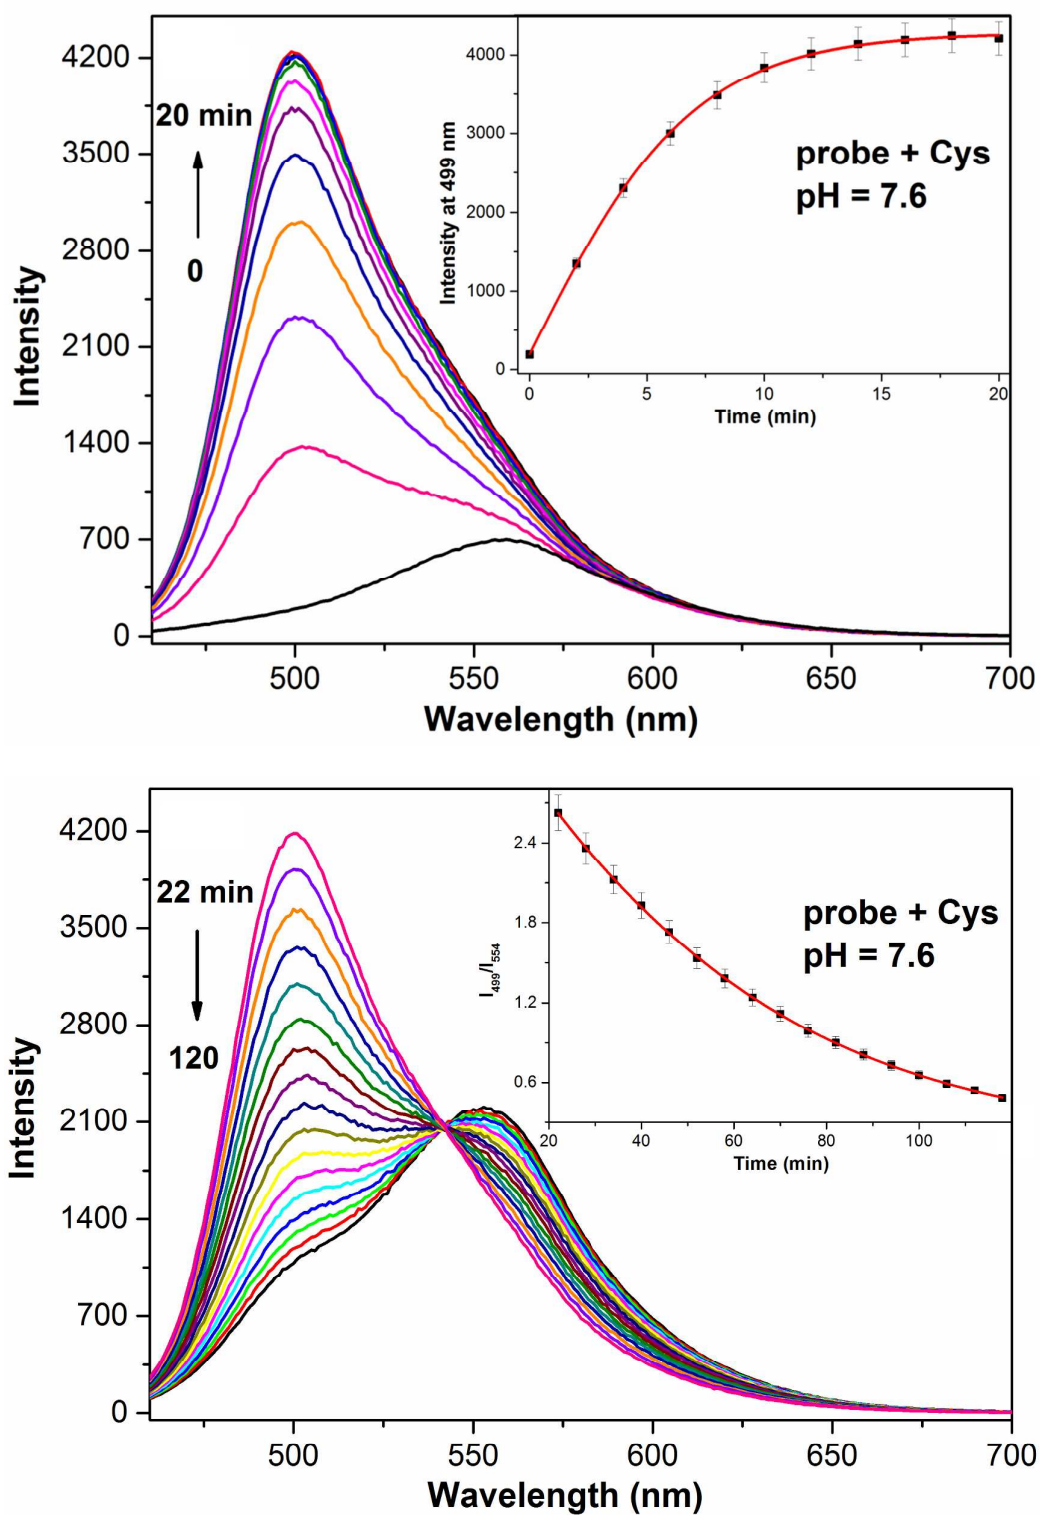

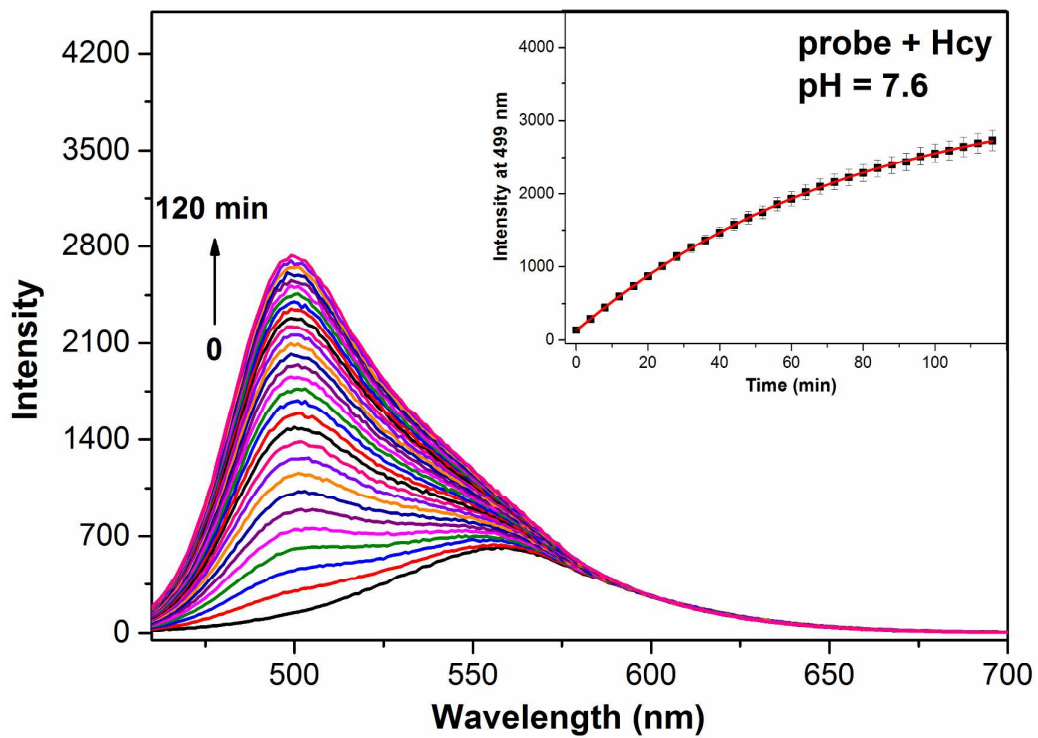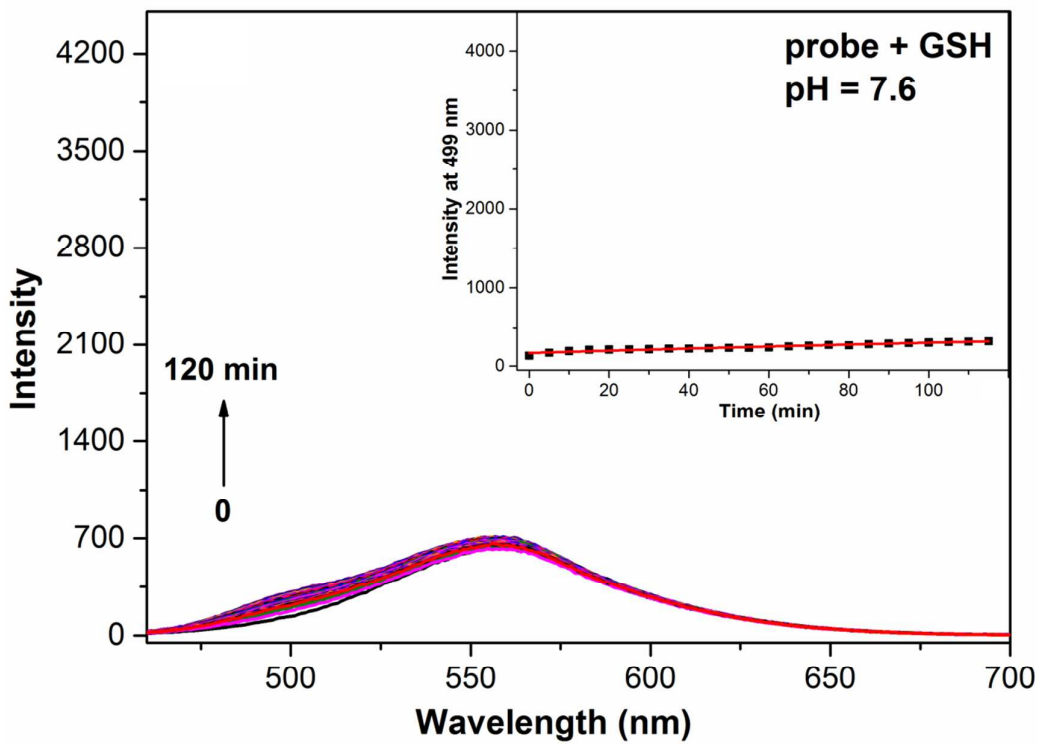

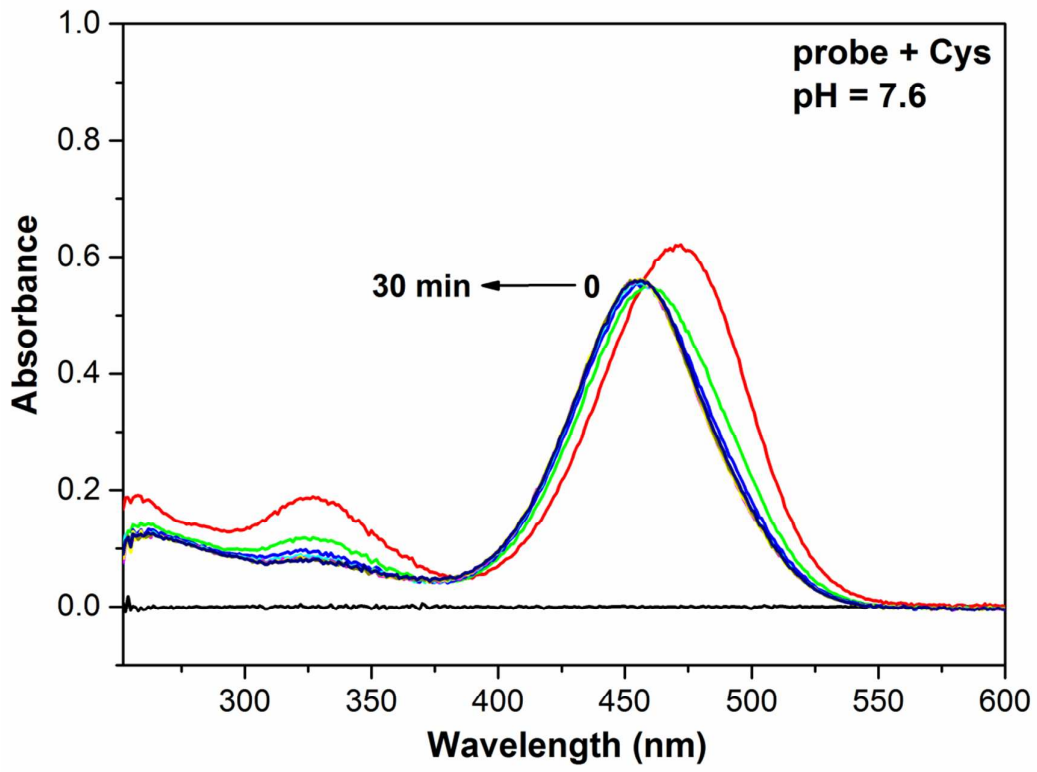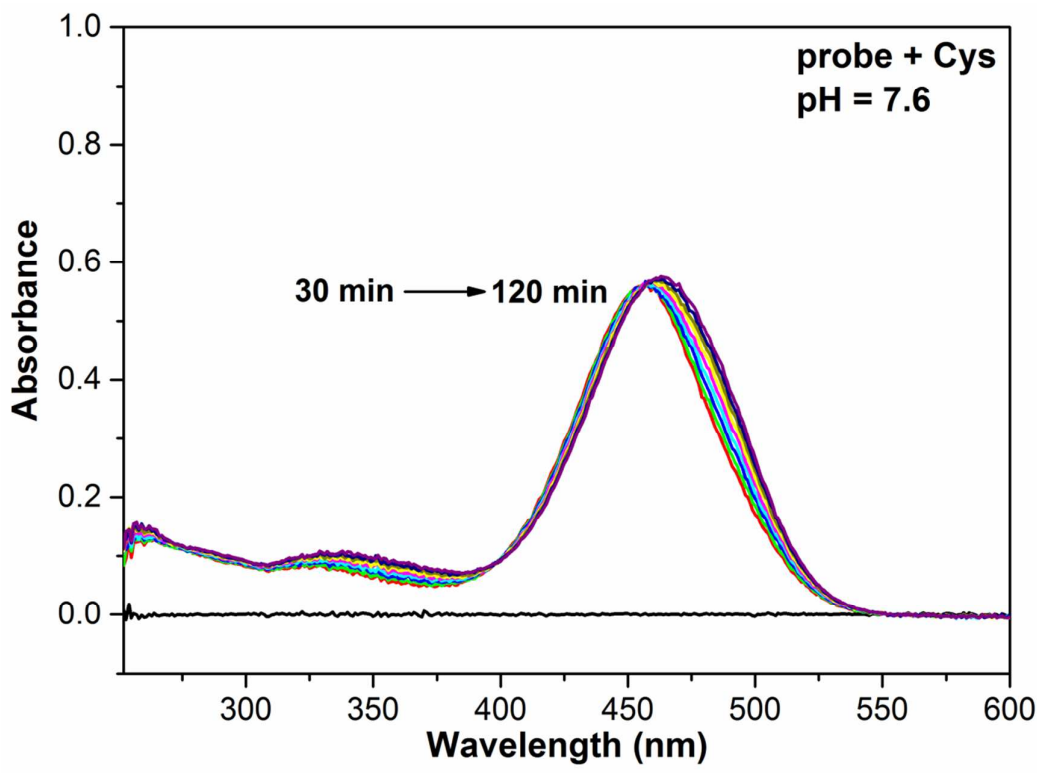



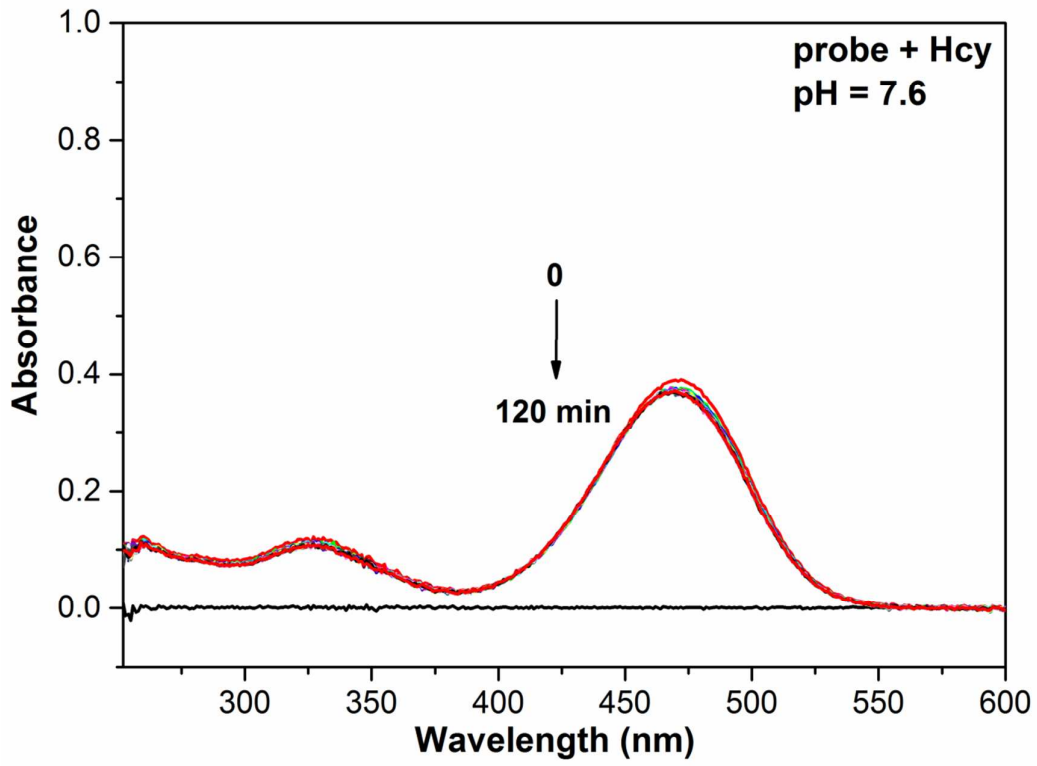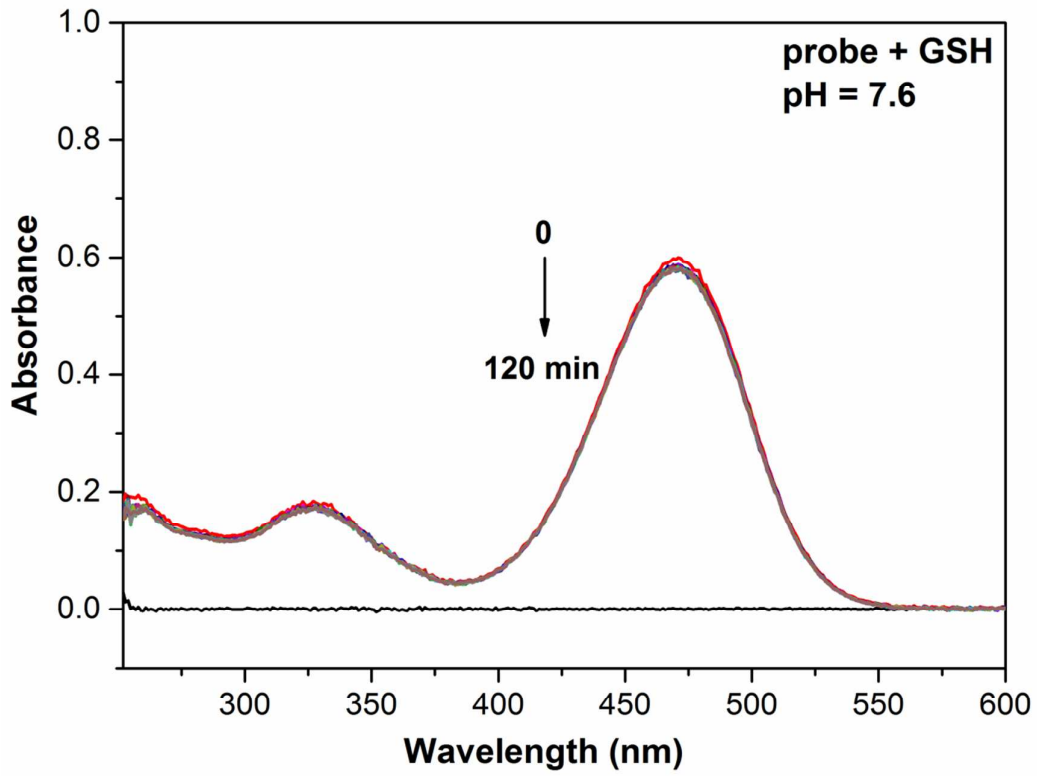

Figure S6 Fluorescent responses of probe 1 towards GSH in Hepes buffer/DMSO (1:1, v/v, pH 7.8) solution at 25 °C and UV-vis responses of probe 1 towards Cys, Hey and GSH in Hepes buffer/DMSO (1:1, v/v, pH 7.8) solution at 25 °C

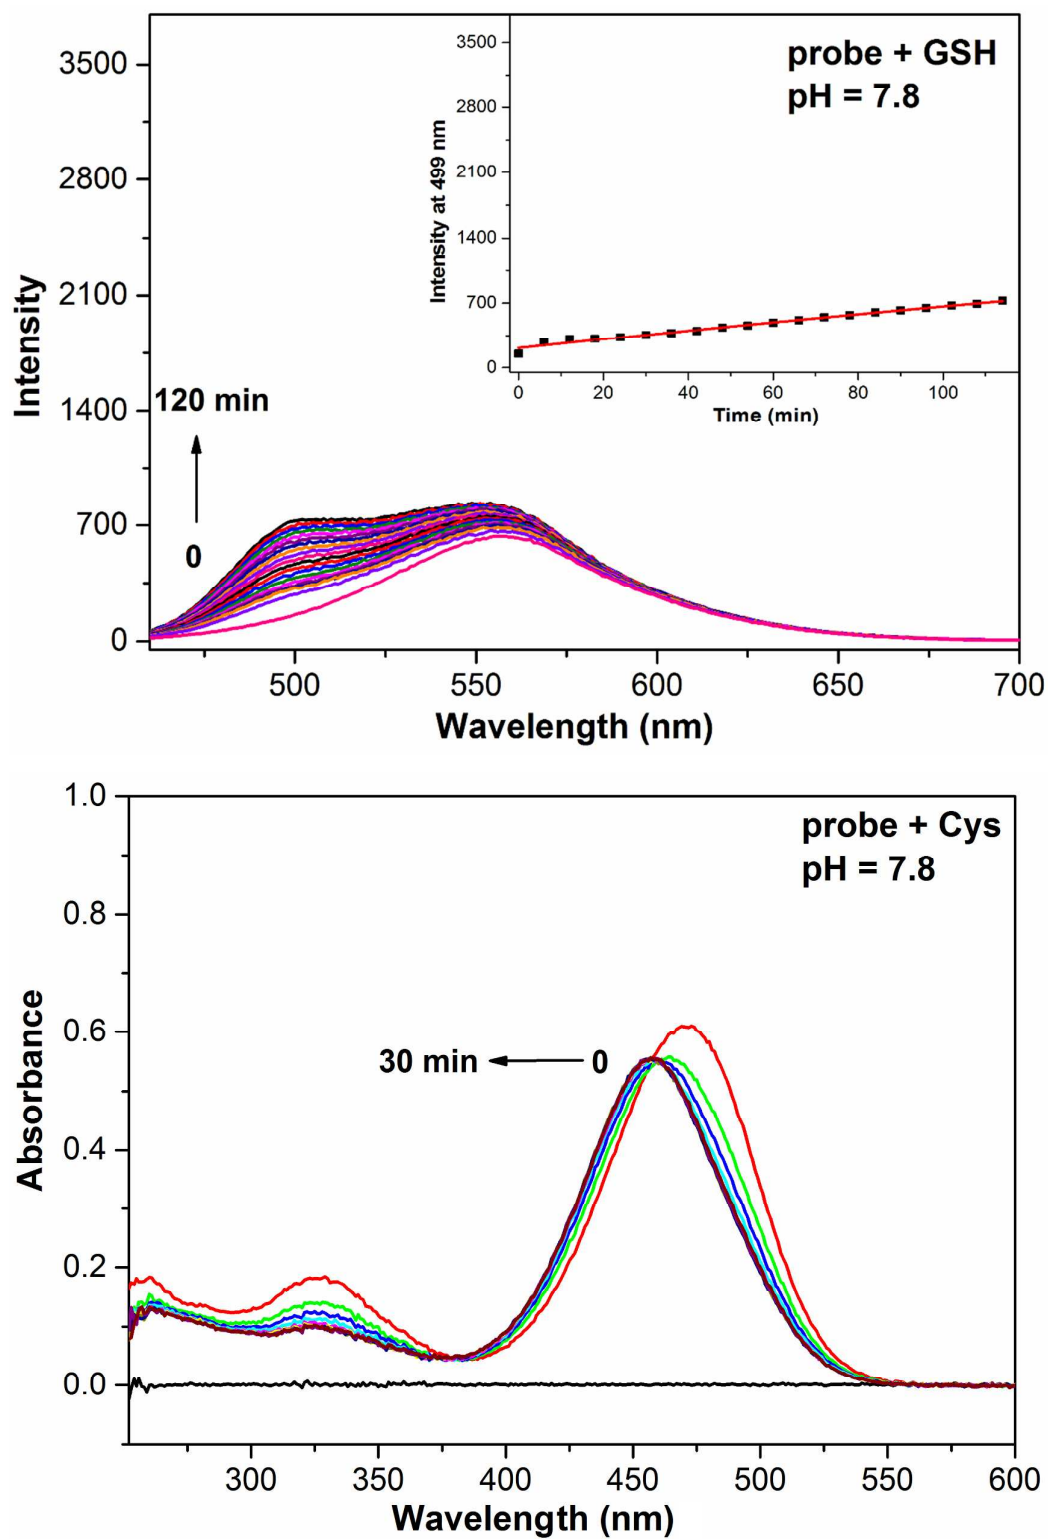

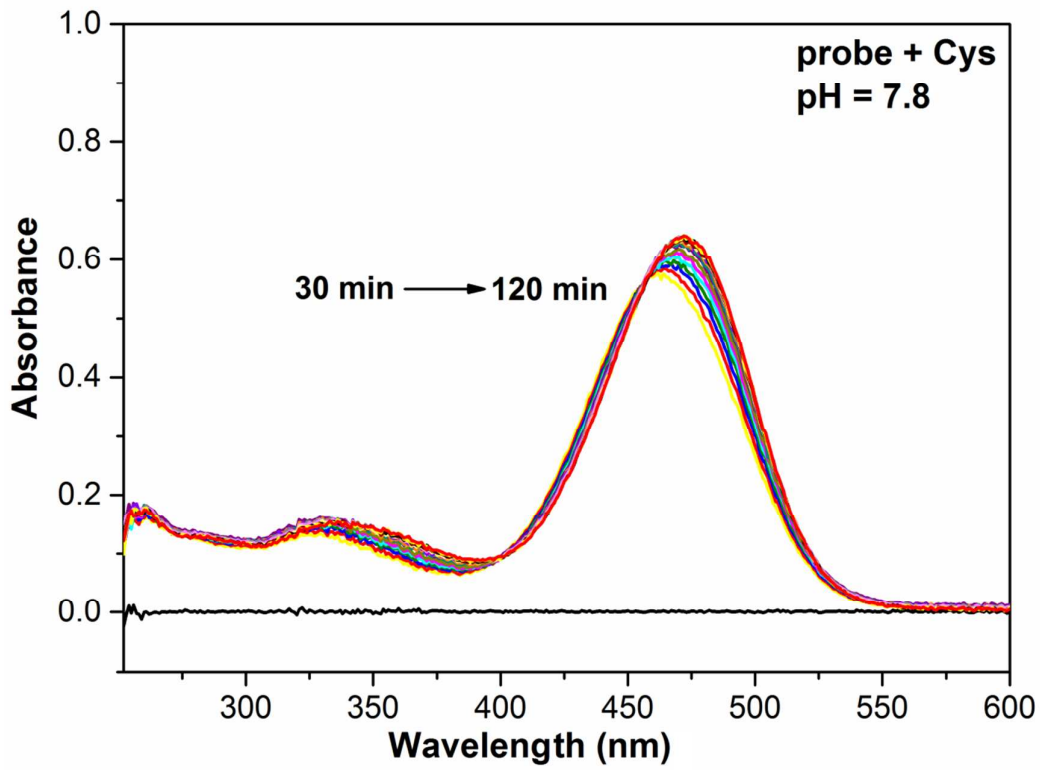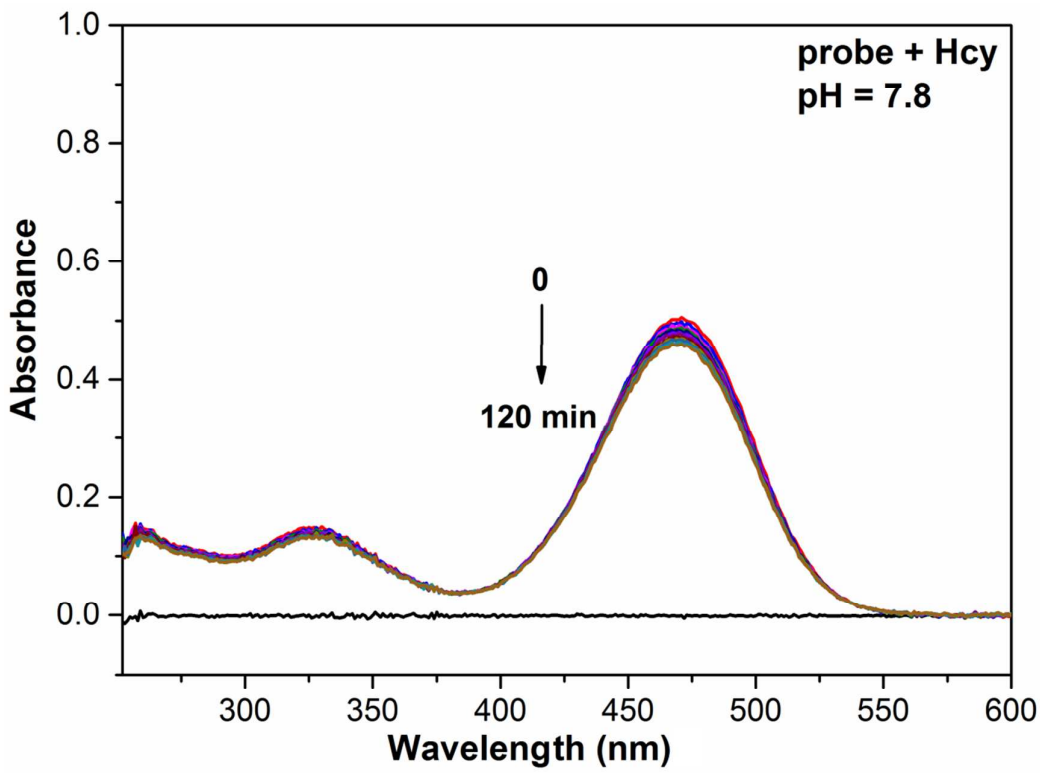

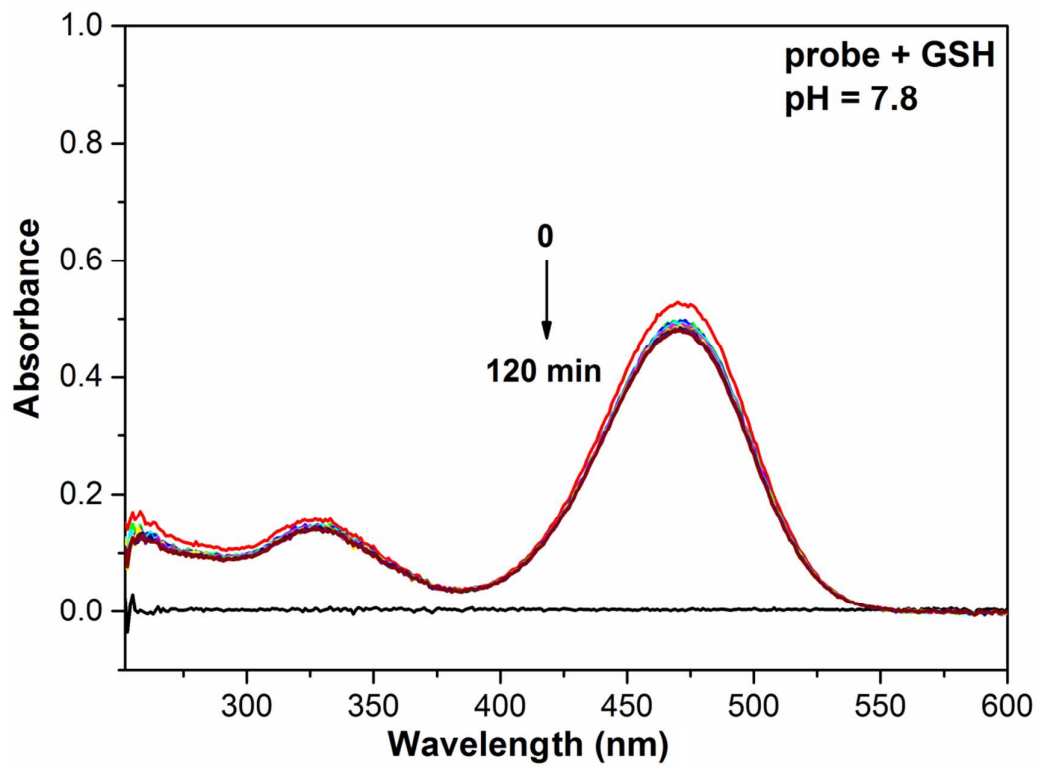

Figure S7 Fluorescent responses of probe 1 towards Cys, Hey and GSH in Hepes buffer/DMSO (1:1, v/v, pH 8.0) solution at 25 °C

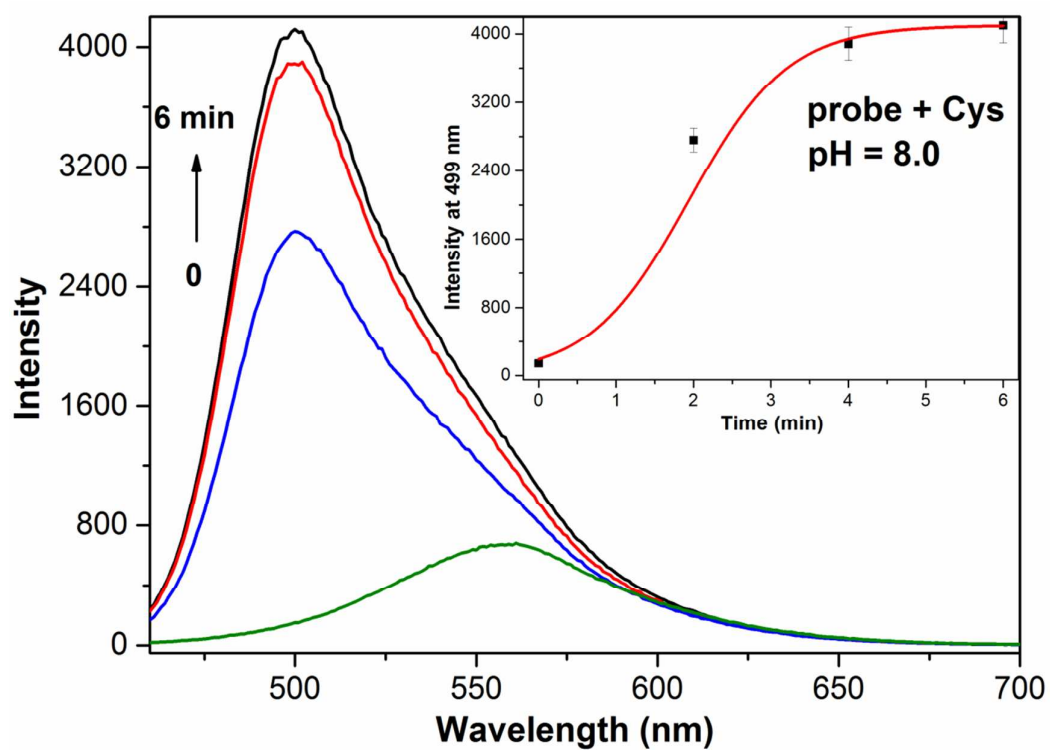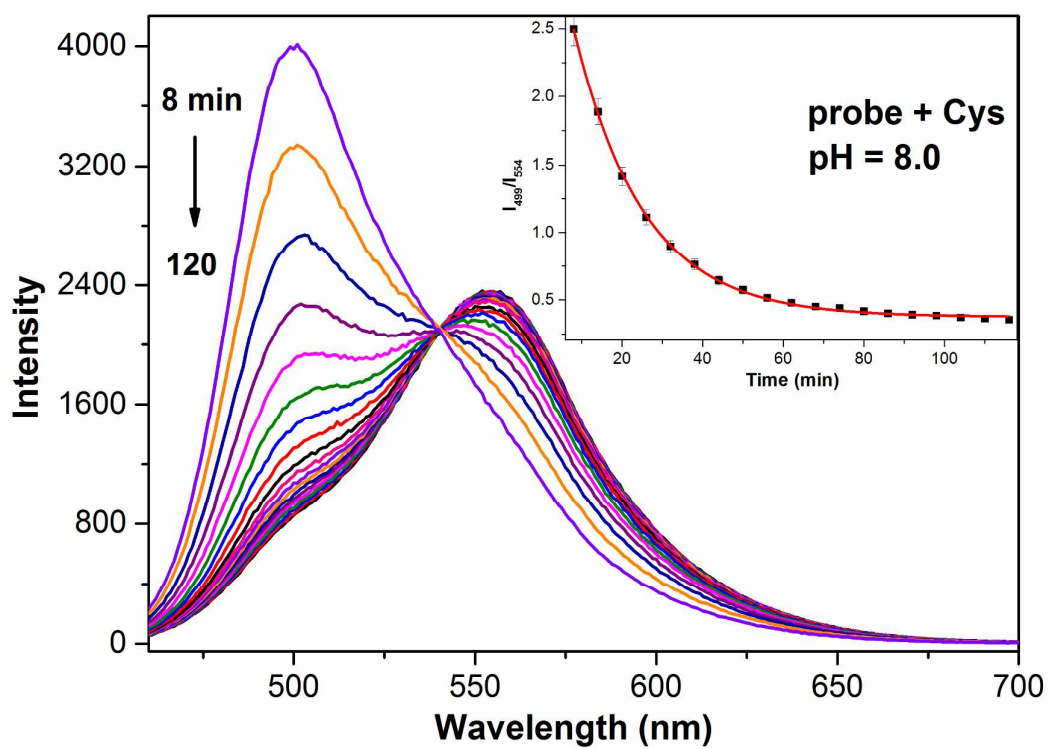

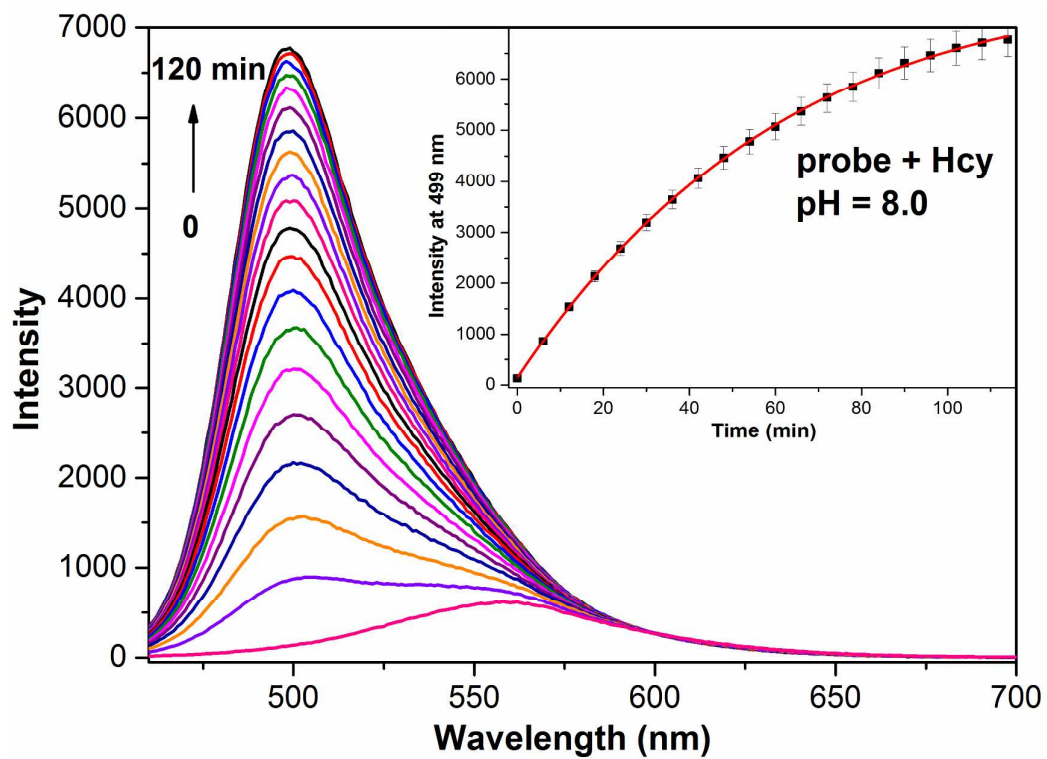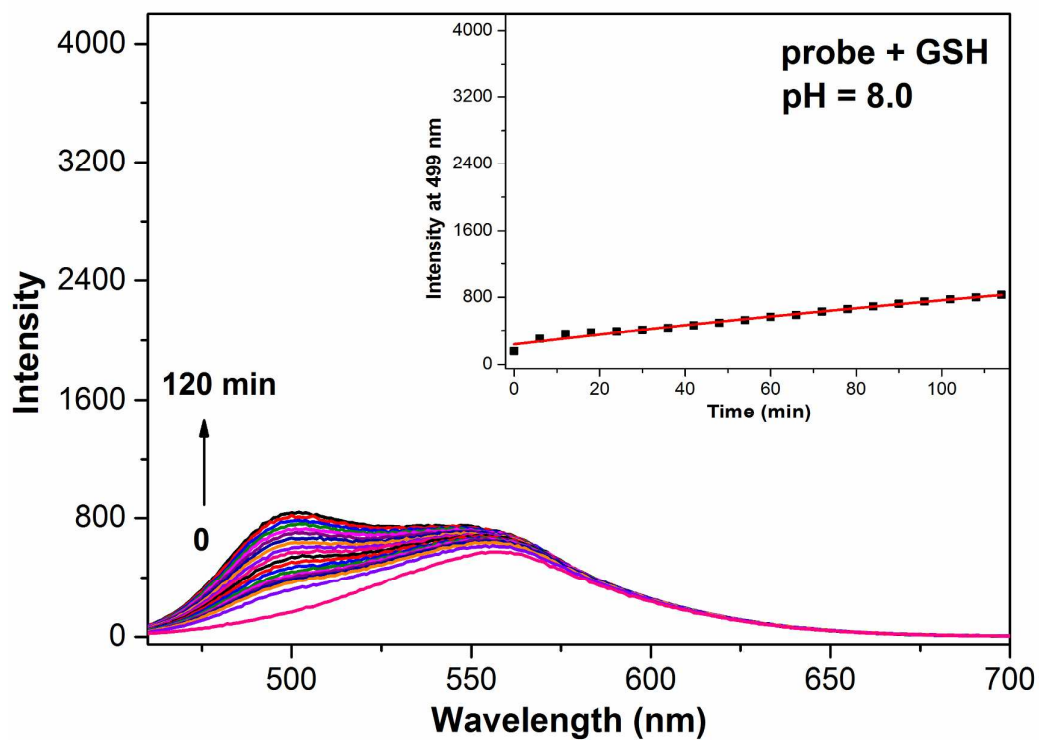

Figure S8 Fluorescent responses of probe 1 towards various amino acids in Hepes buffer/DMSO (1:1, v/v) solution at 25 °C

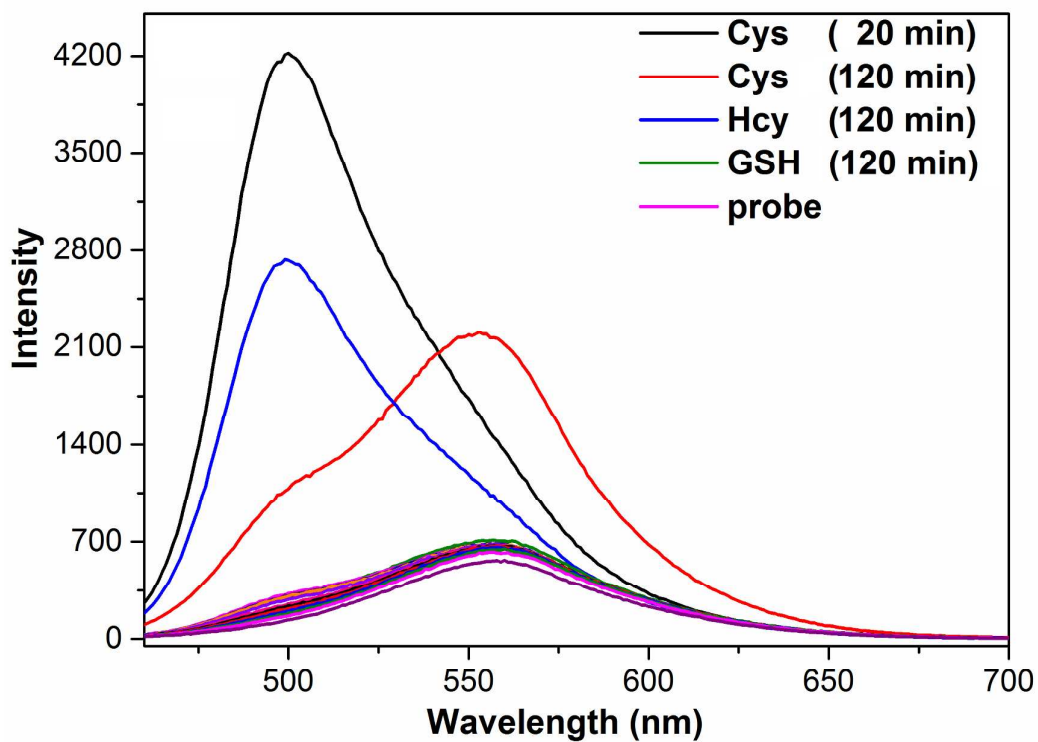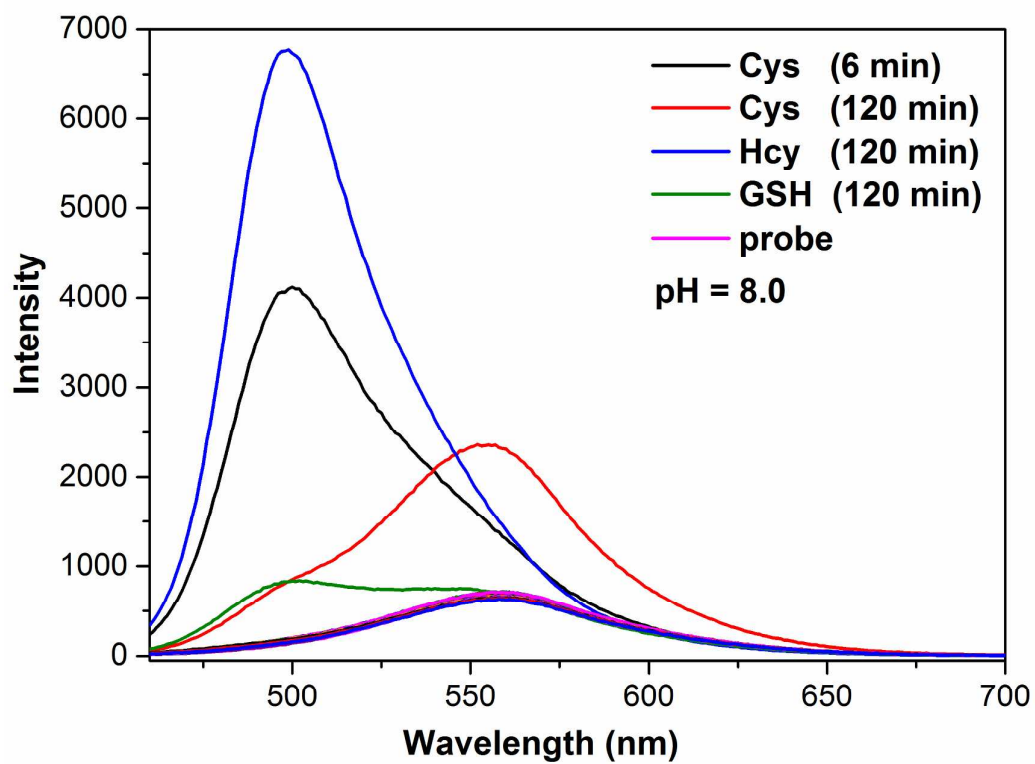

Figure S9 Cell viability values (%) estimated by MTT assay with HepG2 cells, which were cultured in the presence of 0–50  $\mu\text{M}$  probe 1 for 6 and 12 h.

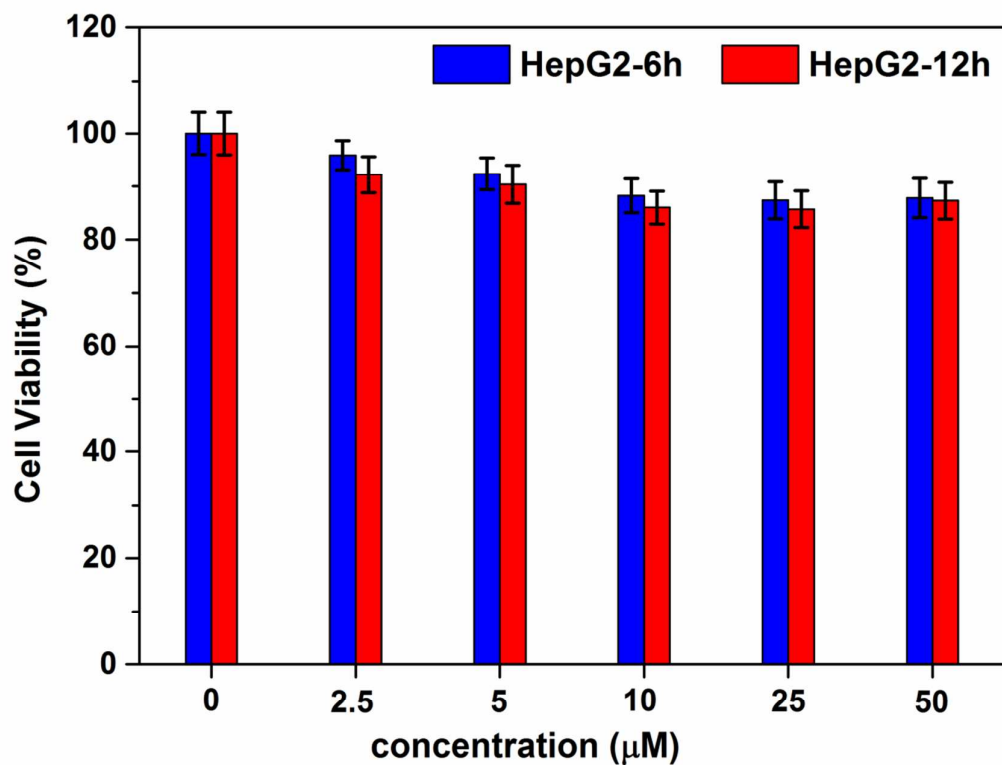

Figure S10 Confocal fluorescent image of HepG2 cells in the pH 7.4 system.

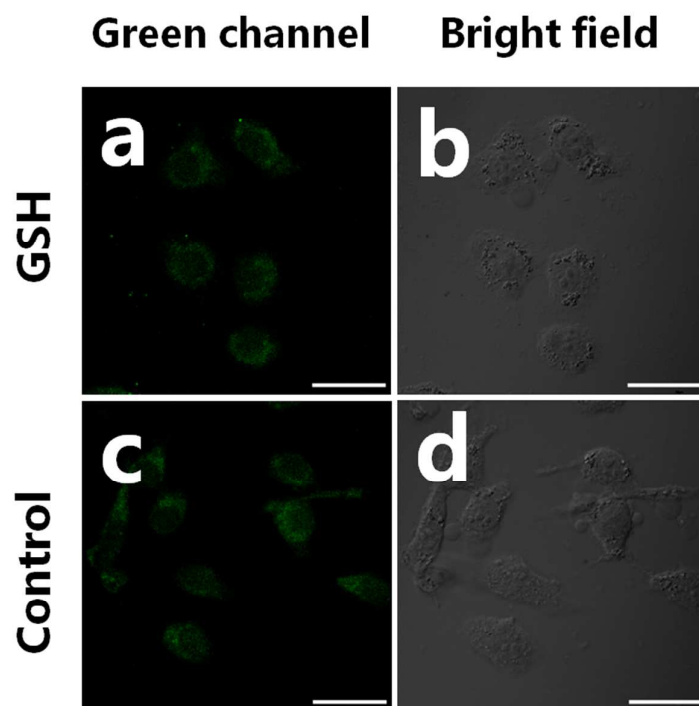



Figure S11 Ratio image of HepG2 cells in the pH 7.8 system (Red channel/Green channel).

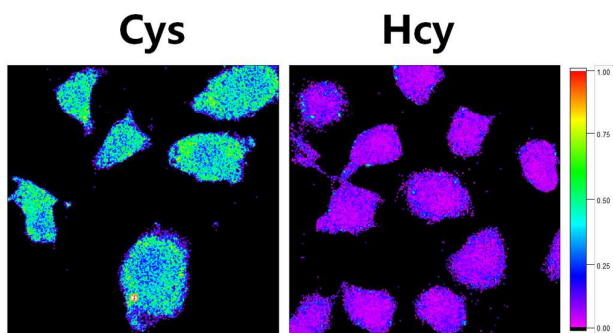

Figure S12 Confocal fluorescent image of HepG2 cells in the pH 7.8 system.

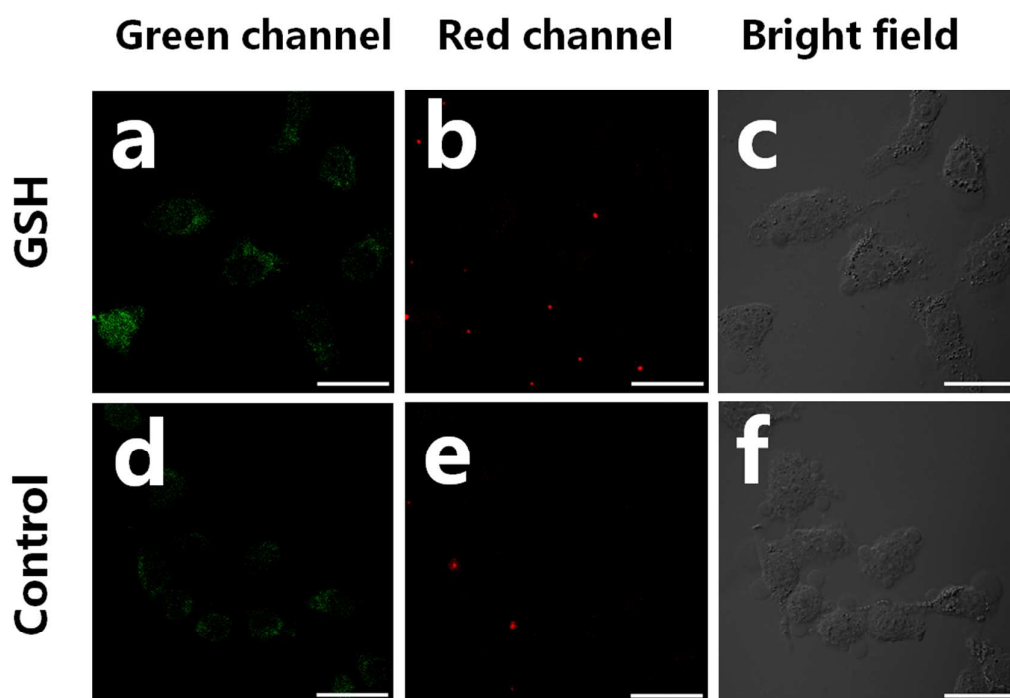

Supplement: NIHMS896830-supplement-supporting_information.pdf [file NIHMS896830-supplement-supporting_information.pdf]
